# Supplementary material for: A meta-analysis of extended ECG monitoring in detection of atrial fibrillation in patients with cryptogenic stroke
Source: HighWire-hosted journal article supplement (doi:10.1136/openhrt-2022-002081), 2022-09-01
Supplement: openhrt-2022-002081supp001_data_supplement.pdf [file openhrt-2022-002081supp001_data_supplement.pdf]

## Supplemental material

Appendix I: Search strategies

Appendix II: Table S1

Appendix III: Figure S1-9

Appendix IV: Table S1-2

Appendix V: Figure S1-3

Appendix VI: Table S1, Figure S1-9

Appendix VII: Table S1

Appendix VIII: Figure S1-4, Table S1

## Appendix I: Search strategies

### MEDLINE (Ovid)

1. exp Electrocardiography, Ambulatory/ or exp Electrocardiography/
2. (12-Lead ECG or 12-Lead EKG or 12-Lead Electrocardiography or ECG or EKG or Electrocardiogram or Electrocardiograph or Ambulatory Electrocardiography or Ambulatory Electrocardiography Monitoring or Dynamic Electrocardiography or Electrocardiography Monitoring, Ambulatory or Electrocardiography, Dynamic or Electrocardiography, Holter or Holter ECG or Holter EKG or Holter Electrocardiography or Holter Monitoring or Monitoring, Ambulatory Electrocardiographic or Monitoring, Holter or Extended ECG monitor\* or Extended Holter monitor\* or Patch ECG\* or Wearable ECG monitor\* or Continuous hospital telemetry or mobile cardiac outpatient telemetry or Patient triggered event recorder\* or implantable loop recorder\* or Implantable cardiac monitor\* or ICM\*).mp. [mp=title, abstract, heading word, drug trade name, original title, device manufacturer, drug manufacturer, device trade name, keyword heading word, floating subheading word, candidate term word]
3. 1 or 2
4. exp Ischemic Stroke/ or exp Stroke/
5. exp Ischemic Attack, Transient/
6. (CVA or Cerebral Stroke or Cerebrovascular Accident or Cerebrovascular Accident, Acute or Cerebrovascular Stroke or Stroke, Acute or Vascular Accident, Brain or Acute Ischemic Stroke or Cryptogenic Embolism Stroke or Cryptogenic Ischemic Stroke or Cryptogenic Stroke or Ischaemic Stroke or Wake-up Stroke or TIA or Transient Ischemic Attack).mp. [mp=title, abstract, original title, name of substance word, subject heading word, floating sub-heading word, keyword heading word, organism

supplementary concept word, protocol supplementary concept word, rare disease  
supplementary concept word, unique identifier, synonyms]

7. 4 or 5 or 6
8. exp Atrial Fibrillation/
9. 3 and 6 and 7
10. limit 9 to english language
11. limit 10 to yr="2011 -Current"

### **EMBASE (Ovid)**

12. exp Electrocardiography, Ambulatory/ or exp Electrocardiography/
13. (12-Lead ECG or 12-Lead EKG or 12-Lead Electrocardiography or ECG or EKG or Electrocardiogram or Electrocardiograph or Ambulatory Electrocardiography or Ambulatory Electrocardiography Monitoring or Dynamic Electrocardiography or Electrocardiography Monitoring, Ambulatory or Electrocardiography, Dynamic or Electrocardiography, Holter or Holter ECG or Holter EKG or Holter Electrocardiography or Holter Monitoring or Monitoring, Ambulatory Electrocardiographic or Monitoring, Holter or Extended ECG monitor\* or Extended Holter monitor\* or Patch ECG\* or Wearable ECG monitor\* or Continuous hospital telemetry or mobile cardiac outpatient telemetry or Patient triggered event recorder\* or implantable loop recorder\* or Implantable cardiac monitor\* or ICM\*).mp. [mp=title, abstract, heading word, drug trade name, original title, device manufacturer, drug manufacturer, device trade name, keyword heading word, floating subheading word, candidate term word]
14. 1 or 2
15. exp Ischemic Stroke/ or exp Stroke/
16. exp Ischemic Attack, Transient/

17. (CVA or Cerebral Stroke or Cerebrovascular Accident or Cerebrovascular Accident, Acute or Cerebrovascular Stroke or Stroke, Acute or Vascular Accident, Brain or Acute Ischemic Stroke or Cryptogenic Embolism Stroke or Cryptogenic Ischemic Stroke or Cryptogenic Stroke or Ischaemic Stroke or Wake-up Stroke or TIA or Transient Ischemic Attack).mp. [mp=title, abstract, original title, name of substance word, subject heading word, floating sub-heading word, keyword heading word, organism supplementary concept word, protocol supplementary concept word, rare disease supplementary concept word, unique identifier, synonyms]
18. 4 or 5 or 6
19. exp Atrial Fibrillation/
20. 3 and 6 and 7
21. limit 9 to english language
22. limit 10 to yr="2011 -Current"

### **Cochrane (CENTRAL)**

- #1. MeSH descriptor: [Electrocardiography] explode all trees
- #2. MeSH descriptor: [Electrocardiography, Ambulatory] explode all trees
- #3. (12 Lead ECG or 12 Lead EKG or 12 Lead Electrocardiography or ECG or EKG or Electrocardiogram or Electrocardiograph or Ambulatory Electrocardiography or Ambulatory Electrocardiography Monitoring or Dynamic Electrocardiography or Electrocardiography Monitoring, Ambulatory or Electrocardiography, Dynamic or Electrocardiography, Holter or Holter ECG or Holter EKG or Holter Electrocardiography or Holter Monitoring or Monitoring, Ambulatory Electrocardiographic or Monitoring, Holter or Extended ECG monitor\* or Extended Holter monitor\* or Patch ECG\* or Weable ECG montior\* or Continuous hospital telemetry or Mobile cardiac outpatient telemetry or Patient triggered event recorder\* or

Prolonged ambulatory ECG or Implantable loop recorder\* or Implantable cardiac monitor\* or ICM\*):ti,ab,kw

#4. #1 or #2 or #3

#5. MeSH descriptor: [Stroke] explode all trees

#6. MeSH descriptor: [Ischemic Stroke] explode all trees

#7. MeSH descriptor: [Ischemic Attack, Transient] explode all trees

#8. (CVA or Cerebral Stroke or Cerebrovascular Accident or Cerebrovascular Accident, Acute or Cerebrovascular Stroke or Stroke, Acute or Vascular Accident, Brain or Acute Ischemic Stroke or Cryptogenic Embolism Stroke or Cryptogenic Ischemic Stroke or Cryptogenic Stroke or Ischaemic Stroke or Wake-up Stroke or Transient Ischemic Attack or TIA or Embolic Stroke of Unknown Source or ESUS):ti,ab,kw

#9. #5 or #6 or #7 or #8

#10. MeSH descriptor: [Atrial Fibrillation] explode all trees

#11. #4 and #9 and #10 with Publication Year from 2011 to 2021

## Appendix II: Overview of all studies

| Study ID            | Design                       | Country             | Condition | Monitoring method    | Duration of monitoring | Sample size | No. of AF | Prevalence of AF | Mean/median age |
|---------------------|------------------------------|---------------------|-----------|----------------------|------------------------|-------------|-----------|------------------|-----------------|
| Acampa 2019         | Cohort study (Single-center) | Italy               | Stroke    | Inpatient monitoring | 1 week                 | 222         | 44        | 19.8%            | 70.4            |
| Bettin 2019         | Cohort study (Single-center) | Germany             | Stroke    | ILR                  | 24 months              | 173         | 33        | 19.1%            | 61.4            |
| Brachmann 2016      | Randomised Controlled Trial  | Europe, Canada, USA | Both      | ILR                  | 36 months              | 221         | 42        | 30%              | 61.6            |
| Christensen 2014    | Cohort study (Single-center) | Denmark             | Stroke    | ILR                  | 18 months              | 85          | 14        | 20.7%            | 58.0            |
| Cotter 2013         | Cohort study (Single-center) | UK                  | Stroke    | ILR                  | 6 months               | 51          | 13        | 25.5%            | 52.0            |
| Cuadrado-Godia 2020 | Cohort study (Single-center) | Spain               | Both      | ILR                  | 30 months              | 65          | 38        | 58.5%            | 75.6            |
| DeAngelis 2020      | Cohort study (Single-center) | Italy               | Stroke    | ILR                  | 30 months              | 58          | 24        | 41%              | 68.1            |
| Flint 2012          | Cohort study (Multi-center)  | USA                 | Stroke    | MCOT                 | 1 month                | 239         | 26        | 6.7%             | 64.6            |

|                |                                   |                |        |                         |           |     |    |       |      |
|----------------|-----------------------------------|----------------|--------|-------------------------|-----------|-----|----|-------|------|
| Fonseca 2014   | Cohort study<br>(Single-center)   | Portugal       | Both   | Inpatient<br>monitoring | 24h       | 264 | 17 | 20.8% | 58.6 |
| Gladstone 2014 | Randomised<br>Controlled<br>Trial | Canada         | Both   | MCOT                    | 1 month   | 286 | 44 | 15.5% | 72.5 |
| Israel 2017    | Cohort study<br>(Single-center)   | Germany        | Stroke | ILR                     | 12 months | 123 | 29 | 23.6% | 65.0 |
| Jorfida 2016   | Cohort study<br>(Single-center)   | Italy          | Stroke | ILR                     | 36 months | 54  | 25 | 46%   | 67.8 |
| Jung 2020      | Cohort study<br>(Single-center)   | South<br>Korea | Stroke | Inpatient<br>monitoring | 24h       | 125 | 32 | 25.6% | 65.3 |
| Kitsiou 2021   | Cohort study<br>(Single-center)   | Germany        | Stroke | ILR                     | 36 months | 123 | 51 | 41.4% | 65.0 |
| Koh 2021       | Randomised<br>Controlled<br>Trial | Malaysia       | Both   | MCOT                    | 1 month   | 105 | 10 | 9.5%  | 65.3 |
| Kulach 2021    | Cohort study<br>(Single-center)   | Poland         | Stroke | MCOT                    | 1 month   | 72  | 1  | 1.4%  | 59.0 |
| Kulach 2019    | Cohort study<br>(Single-center)   | Poland         | Stroke | MCOT                    | 7 days    | 78  | 7  | 9%    | 60.0 |
| Lee 2015       | Cohort study<br>(Single-center)   | Singapore      | Both   | Inpatient<br>monitoring | 3 days    | 127 | 12 | 9.4%  | 66.0 |

|                     |                                 |         |        |                         |           |     |    |                              |      |
|---------------------|---------------------------------|---------|--------|-------------------------|-----------|-----|----|------------------------------|------|
| Liantinioti<br>2017 | Cohort study<br>(Single-center) | Greece  | Stroke | Inpatient<br>monitoring | 24h       | 184 | 13 | 7%                           | 57.0 |
| Liantinioti<br>2019 | Cohort study<br>(Single-center) | Greece  | Stroke | Inpatient<br>monitoring | 24h       | 373 | 29 | 8%                           | 60.0 |
| Lips 2020           | Cohort study<br>(Single-center) | Germany | Both   | ILR                     | 30 months | 88  | 19 | 21.6%                        | 66.5 |
| Lumikari<br>2019    | Cohort study<br>(Single-center) | Finland | Stroke | MCOT                    | 1 month   | 57  | 7  | 12.3%                        | 64.5 |
| Lumikari<br>2020    | Cohort study<br>(Single-center) | Finland | Stroke | MCOT                    | 2 weeks   | 15  | 1  | 6.7%                         | 59.5 |
| Lyren<br>2020       | Cohort study<br>(Single-center) | Sweden  | Both   | MCOT                    | 1 month   | 100 | 9  | 9%                           | 67.6 |
| Makimoto<br>2017    | Cohort study<br>(Single-center) | Germany | Stroke | ILR                     | 12 months | 146 | 30 | 21%                          | 62.0 |
| Manina<br>2014      | Cohort study<br>(Single-center) | Italy   | Both   | MCOT                    | 4 days    | 114 | 12 | 24.3%                        | 63.1 |
| Milstein<br>2020    | Cohort study<br>(Single-center) | USA     | Stroke | ILR                     | 12 months | 343 | 67 | 5% (30 days)<br>21% (1 year) | 68   |
| Muller<br>2017      | Cohort study<br>(Single-center) | Germany | Stroke | ILR                     | 12 months | 90  | 16 | 18%                          | 57.7 |
| Pagola<br>2018      | Cohort study<br>(Single-center) | Spain   | Stroke | MCOT                    | 1 month   | 146 | 32 | 21.9%                        | 76.0 |



|                         |                                 |                    |        |              |                                        |     |                            |       |      |
|-------------------------|---------------------------------|--------------------|--------|--------------|----------------------------------------|-----|----------------------------|-------|------|
| Pagola<br>2021          | Cohort study<br>(Multi-center)  | Spain              | Stroke | MCOT         | 1 month                                | 253 | 54                         | 21.3% | 74.4 |
| Pedersen<br>2018        | Cohort study<br>(Single-center) | Denmark            | TIA    | ILR          | 12 months                              | 105 | 7                          | 6.7%  | 65.4 |
| Petrovicova<br>2021     | Cohort study<br>(Single-center) | Slovak<br>Republic | Both   | ILR          | 12 months                              | 100 | 24                         | 24%   | 70.1 |
| Poli<br>2016            | Cohort study<br>(Single-center) | Germany            | Both   | ILR          | 12 months                              | 75  | 25                         | 33.3% | 66.4 |
| Poulsen<br>2017         | Cohort study<br>(Single-center) | Denmark            | Both   | MCOT         | 1 month                                | 95  | 20                         | 21.1% | 78   |
| Rabinstein<br>2013      | Cohort study<br>(Single-center) | USA                | Stroke | MCOT         | 3 weeks                                | 64  | 3                          | 4.7%  | 67.9 |
| Reinke<br>2018          | Cohort study<br>(Single-center) | Germany            | Stroke | ILR          | 24 months                              | 105 | 19                         | 18%   | 64.4 |
| Riordan<br>2020         | Cohort study<br>(Single-center) | USA                | Stroke | ILR          | 24 months                              | 293 | 74                         | 25%   | 67.5 |
| Ritter<br>2013          | Cohort study<br>(Single-center) | Germany            | Stroke | ILR,<br>MCOT | 12 months<br>(ILR)<br>7 days<br>(MCOT) | 60  | 10<br>(ILR)<br>1<br>(MCOT) | 17%   | 63.0 |
| RubioCam<br>pal<br>2020 | Cohort study<br>(Single-center) | Spain              | Both   | MCOT         | 3 weeks                                | 50  | 11                         | 22%   | 69.0 |
| Sanak<br>2015           | Cohort study<br>(Single-center) | Czech<br>Republic  | Stroke | MCOT         | 3 weeks                                | 95  | 9                          | 9.5%  | 39.1 |

|                                                                                                                                                       |                                 |           |        |                                 |                                                        |                                       |                                                |                                       |      |
|-------------------------------------------------------------------------------------------------------------------------------------------------------|---------------------------------|-----------|--------|---------------------------------|--------------------------------------------------------|---------------------------------------|------------------------------------------------|---------------------------------------|------|
| Seow 2018                                                                                                                                             | Cohort study<br>(Single-center) | Singapore | Both   | ILR                             | 12 months                                              | 71                                    | 11                                             | 12.9% (6 months)<br>15.2% (12 months) | 61.9 |
| Toyoda 2021                                                                                                                                           | Cohort study<br>(Multi-center)  | Japan     | Stroke | MCOT                            | 1 week                                                 | 206                                   | 13                                             | 6.3%                                  | 71.0 |
| Triantafyllou 2020                                                                                                                                    | Cohort study<br>(Single-center) | Greece    | Both   | ILR,<br>Inpatient<br>monitoring | 18 months<br>(ILR)<br>24h<br>(Inpatient<br>monitoring) | 373<br>Holter<br>; 123<br>ILR/I<br>CM | 26<br>(ILR)<br>28<br>(Inpatient<br>monitoring) | 7.5% (Holter)<br>21.1% (ICM)          | 60.0 |
| Tu 2014                                                                                                                                               | Cohort study<br>(Single-center) | Australia | Stroke | MCOT                            | 3 weeks                                                | 20                                    | 1                                              | 5.0% (28 days),<br>20.0% (2 years)    | 66.0 |
| Ungar 2021                                                                                                                                            | Cohort study<br>(Multi-center)  | Italy     | Stroke | ILR                             | 24 months                                              | 334                                   | 92                                             | 27.5%                                 | 67.4 |
| Victor 2018                                                                                                                                           | Cohort study<br>(Single-center) | Spain     | Stroke | ILR                             | 24 months                                              | 65                                    | 12                                             | 29.2%                                 | 65.4 |
| Yayehd 2015                                                                                                                                           | Cohort study<br>(Single-center) | France    | Stroke | MCOT                            | 3 weeks                                                | 39                                    | 1                                              | 2.6%                                  | 48.0 |
| USA: United States of America; UK: United Kingdom; AF: Atrial fibrillation; ILR: Implantable loop recorder; MCOT: Mobile cardiac outpatient telemetry |                                 |           |        |                                 |                                                        |                                       |                                                |                                       |      |

**Table S1.** Overview of study characteristics

## Appendix III: Additional forest plots

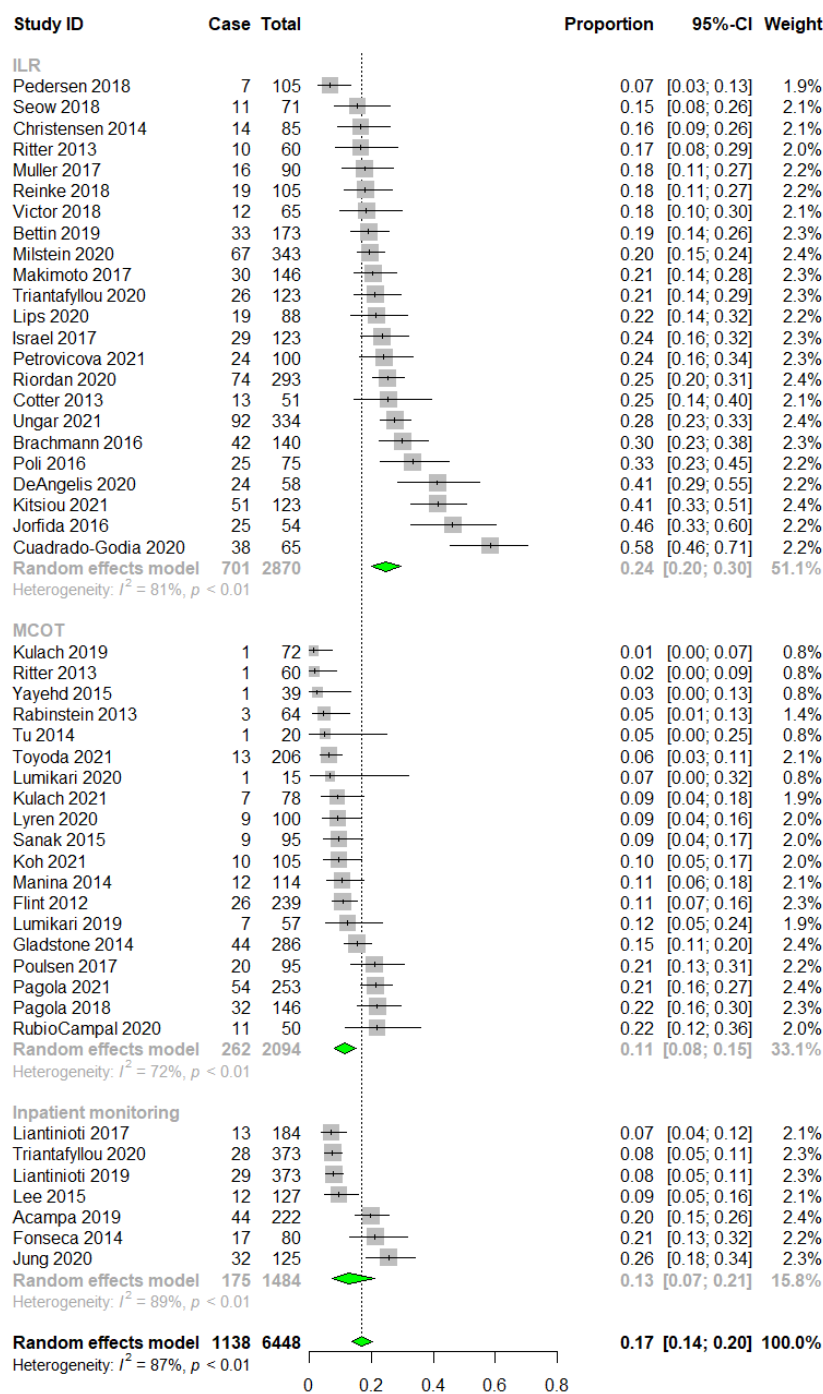

Figure S1. Overall pooled AF detection rates

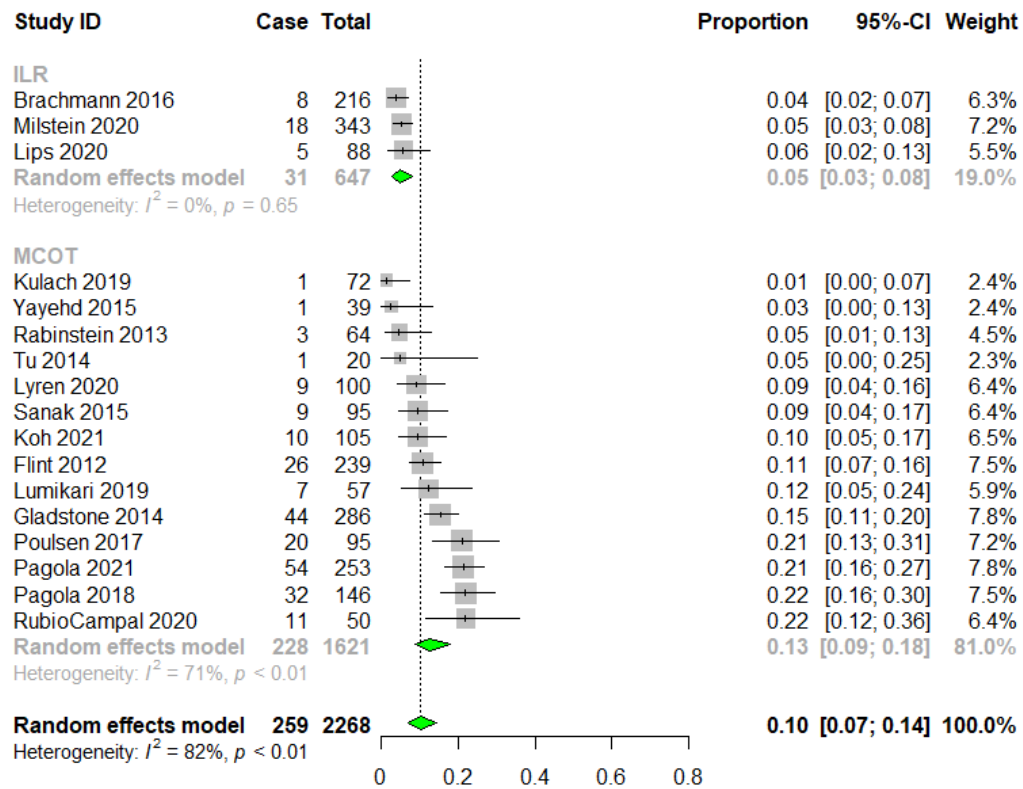

**Figure S2.** Pooled AF detection rates for ILRs and MCOTs at 1 month

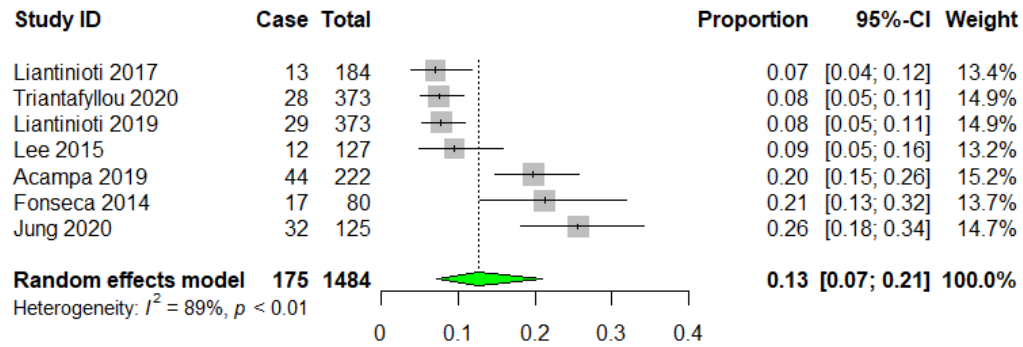

**Figure S3.** Pooled AF detection rates for inpatient monitoring devices

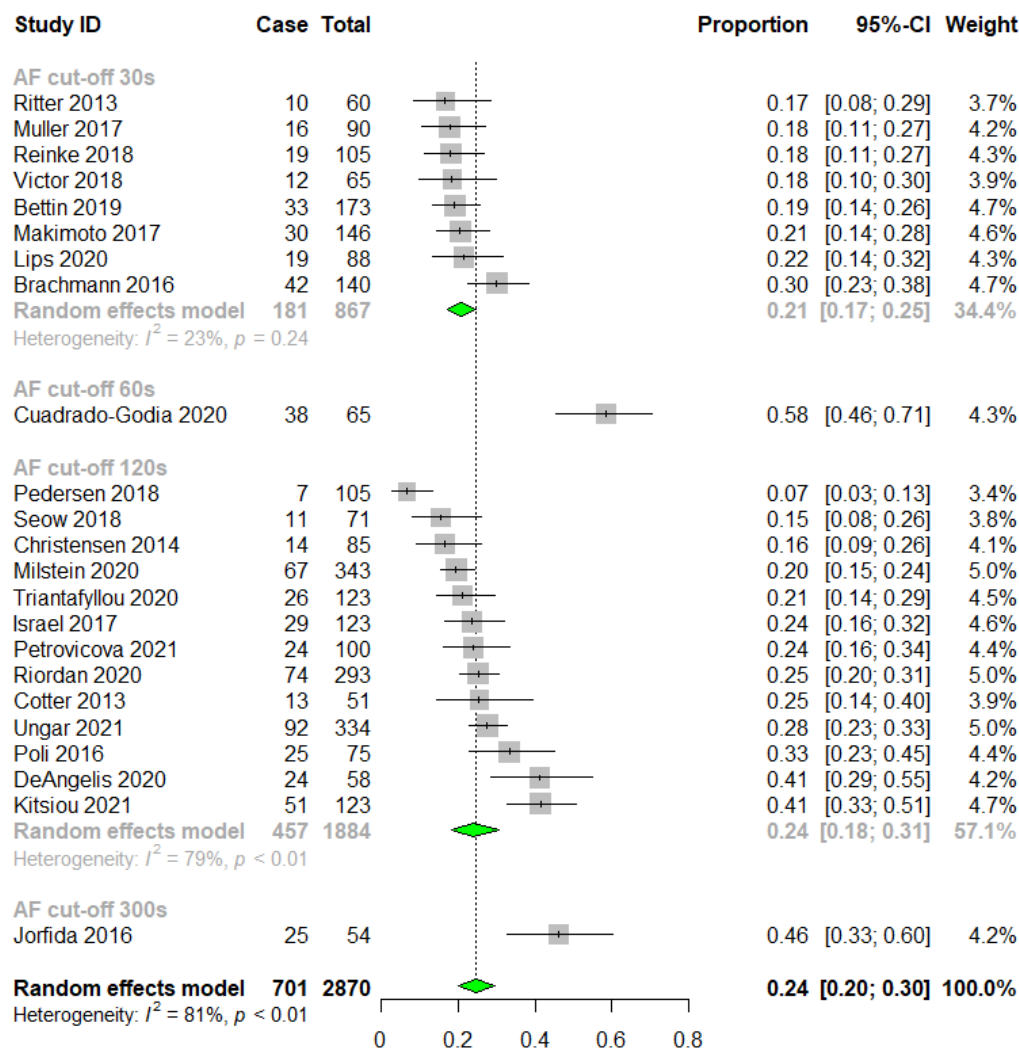

**Figure S4.** Pooled AF detection rates for ILRs by AF cut-off duration

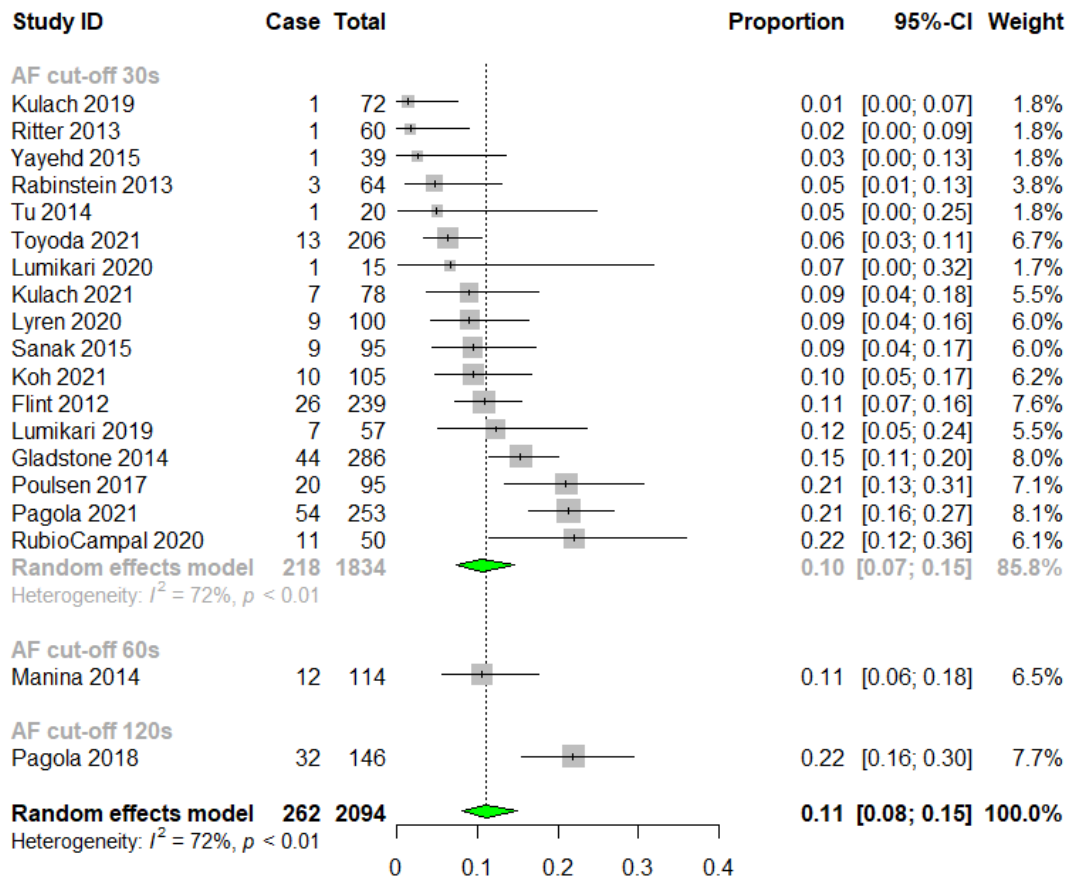

**Figure S5.** Pooled AF detection rates for MCOTs by AF cut-off duration

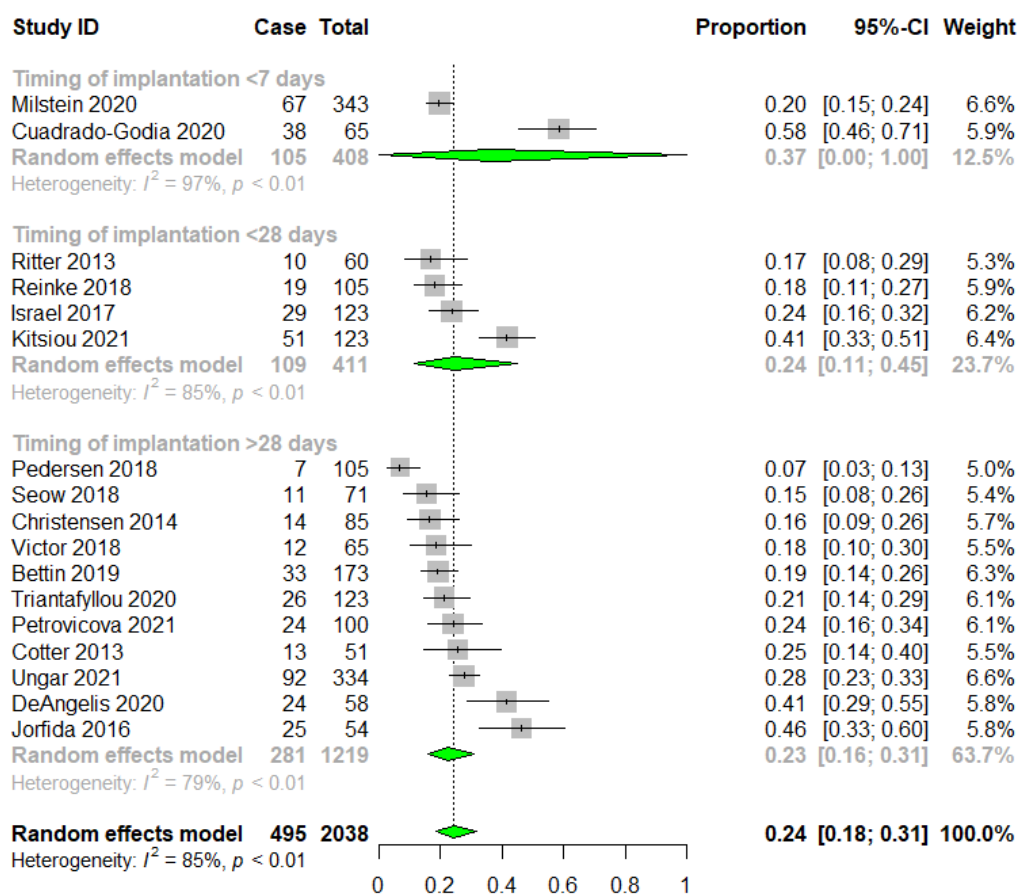

**Figure S6.** Pooled AF detection rates for ILRs by timing of device implantation



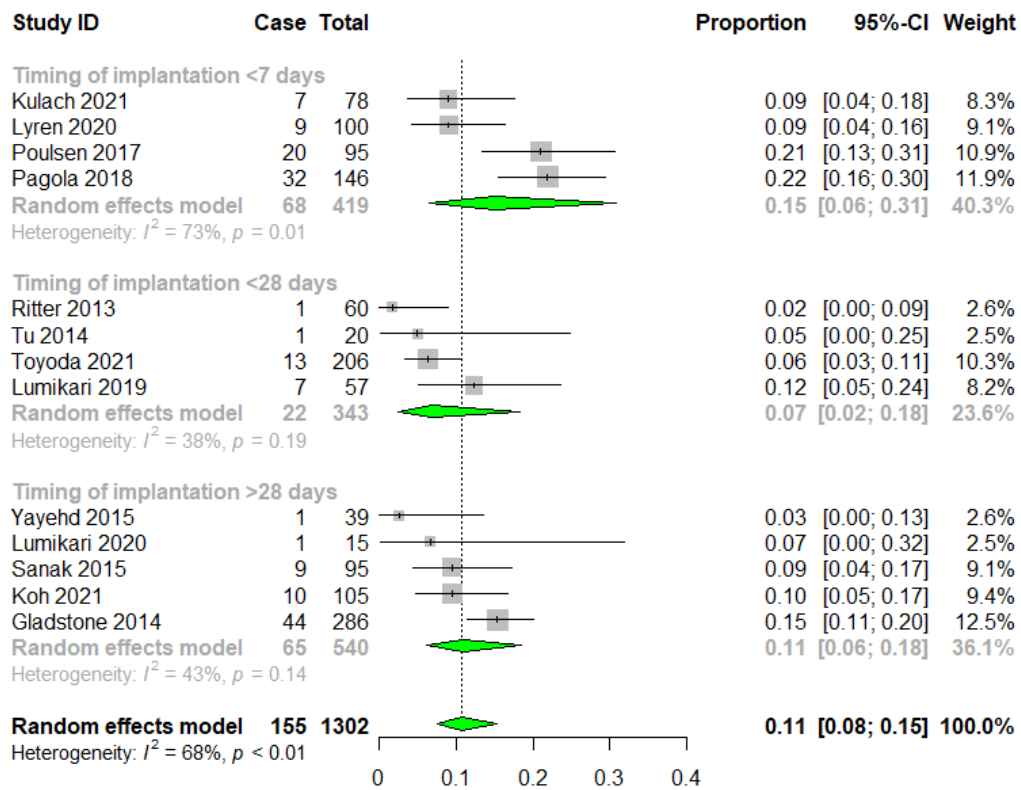

**Figure S7.** Pooled AF detection rates for MCOTs by timing of device implantation

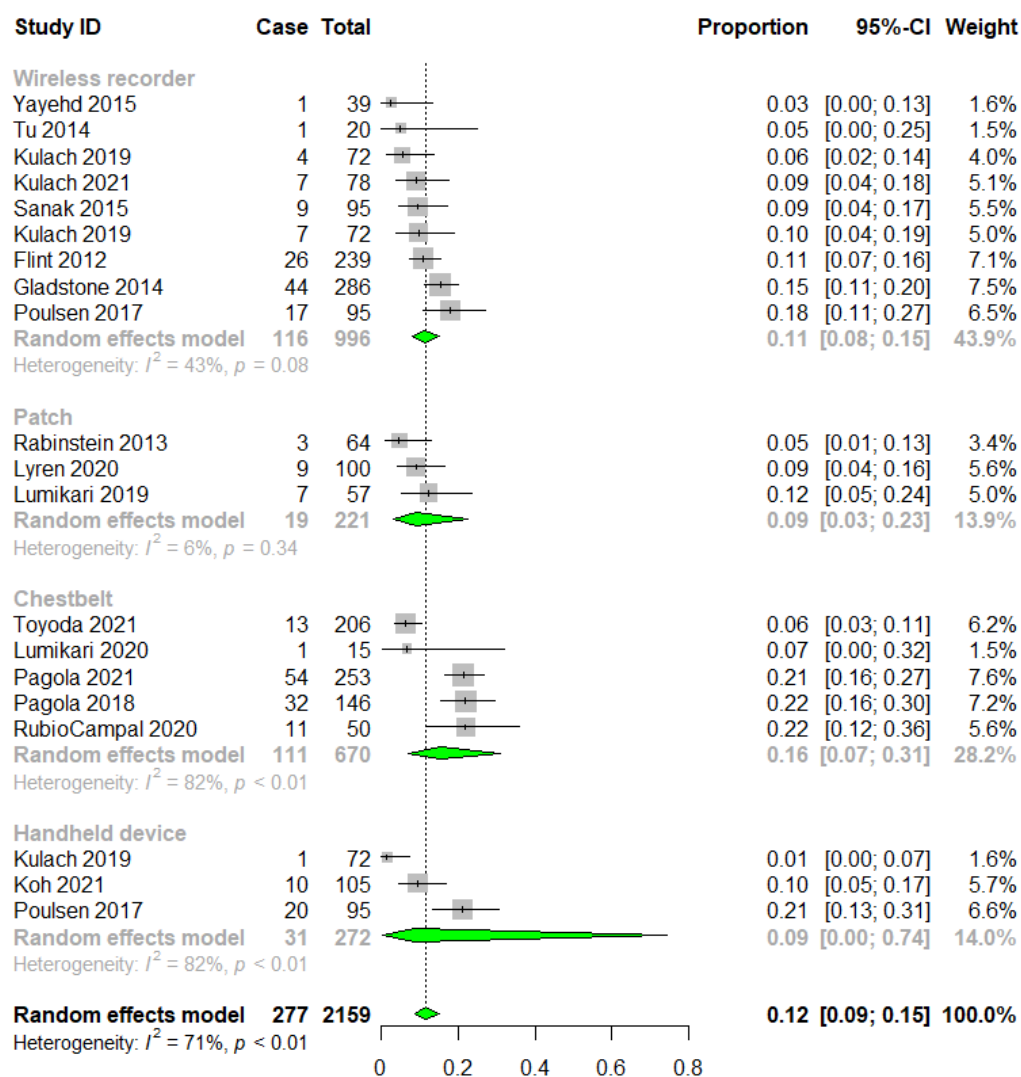

**Figure S8.** Pooled AF detection rates for MCOTs by type of device

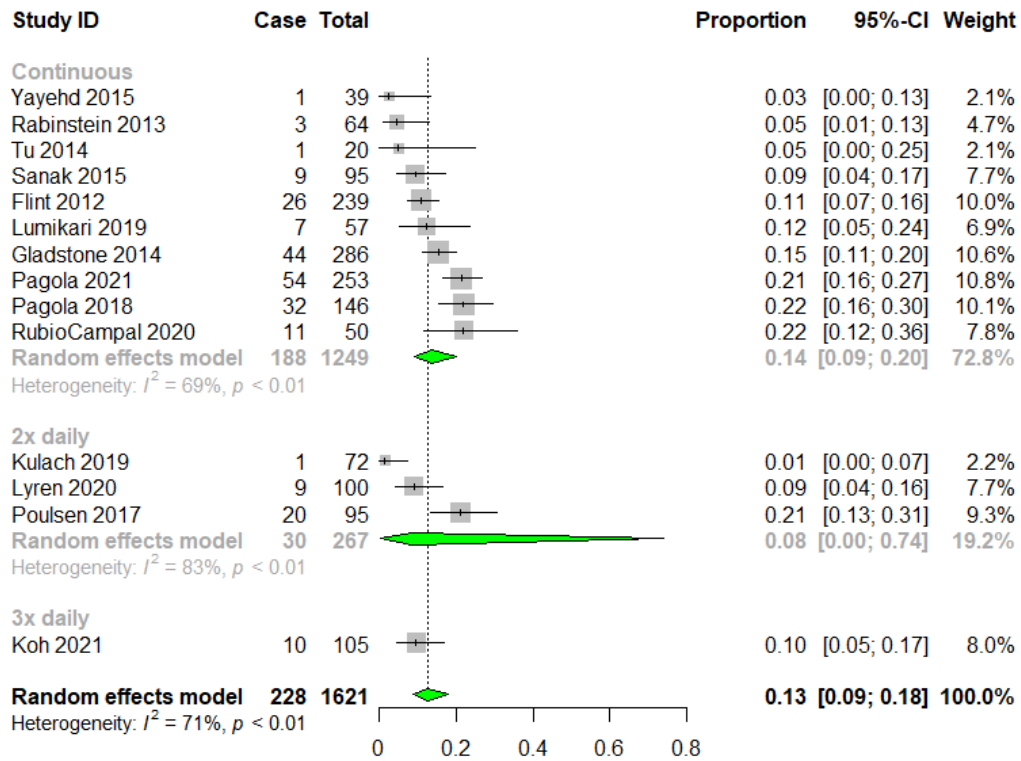

**Figure S9.** Pooled AF detection rates by frequency of monitoring at 28 days

## Appendix IV: Comparison of study populations

| Cohort characteristics                         | Studies using ILR    | Studies using MCOT   | Significantly different? (P value) |
|------------------------------------------------|----------------------|----------------------|------------------------------------|
| Total no of studies                            | 23                   | 19                   | -                                  |
| No of participants                             | 2870                 | 2094                 | -                                  |
| Average age                                    | 65.0 +/- 4.0         | 67.3 +/- 6.4         | <0.0001                            |
| Average CHA <sub>2</sub> DS <sub>2</sub> -VASc | 3.3 +/- 1.5 (n=21)   | 2.2 +/- 2.2 (n=12)   | <0.0001                            |
| Timing of device implantation                  | 38.8 +/- 48.2 (n=17) | 20.7 +/- 36.4 (n=13) | <0.0001                            |

Table S1. Comparison of study populations

| Study ID            | Monitoring method    | Duration of monitoring | Sample size | No. of AF | Prevalence of AF | Mean/median age | CHA <sub>2</sub> D S <sub>2</sub> -VASc | NIHSS            | Rankin      | LVEF       |
|---------------------|----------------------|------------------------|-------------|-----------|------------------|-----------------|-----------------------------------------|------------------|-------------|------------|
| Acampa 2019         | Inpatient monitoring | 1 week                 | 222         | 44        | 19.8%            | 70.4            | 5 (1.2)                                 | NR               | NR          | NR         |
| Bettin 2019         | ILR                  | 24 months              | 173         | 33        | 19.1%            | 61.4            | 4 (1.4)                                 | NR               | NR          | NR         |
| Brachmann 2016      | ILR                  | 36 months              | 221         | 42        | 30%              | 61.6            | 2.96                                    | 1.6 (2.7)        | NR          | NR         |
| Christensen 2014    | ILR                  | 18 months              | 85          | 14        | 20.7%            | 58.0            | 4                                       | 0 (range 0-1)    | NR          | NR         |
| Cotter 2013         | ILR                  | 6 months               | 51          | 13        | 25.5%            | 52.0            | 3 (IQR 2-4)                             | NR               | NR          | NR         |
| Cuadrado-Godia 2020 | ILR                  | 30 months              | 65          | 38        | 58.5%            | 75.6            | 4.5 (IQR 4-5)                           | 2.2 (range 2-14) | 0 (IQR 0-1) | NR         |
| DeAngelis 2020      | ILR                  | 30 months              | 58          | 24        | 41%              | 68.1            | 4.4 (1.4)                               | 4.4 (2.1)        | NR          | 61.5 (4.0) |
| Flint 2012          | MCOT                 | 1 month                | 239         | 26        | 6.7%             | 64.6            | NR                                      | 4.2 (4.5)        | 1.0 (0.1)   | 58.1 (6.4) |

|                 |                      |           |     |    |       |      |               |                |             |            |
|-----------------|----------------------|-----------|-----|----|-------|------|---------------|----------------|-------------|------------|
| Fonseca 2014    | Inpatient monitoring | 24h       | 264 | 17 | 20.8% | 58.6 | NR            | 13 (IQR 12)    | NR          | NR         |
| Gladstone 2014  | MCOT                 | 1 month   | 286 | 44 | 15.5% | 72.5 | 3 (range 2-6) | NR             | NR          | NR         |
| Israel 2017     | ILR                  | 12 months | 123 | 29 | 23.6% | 65.0 | 4.5 (1.3)     | 3              | 2 (IQR 2)   | 59.6 (2.4) |
| Jorfida 2016    | ILR                  | 36 months | 54  | 25 | 46%   | 67.8 | 4.5 (1.2)     | NR             | NR          | 60 (6.1)   |
| Jung 2020       | Inpatient monitoring | 24h       | 125 | 32 | 25.6% | 65.3 | 2.7 (1.5)     | NR             | NR          | NR         |
| Kitsiou 2021    | ILR                  | 36 months | 123 | 51 | 41.4% | 65.0 | 4.8           | NR             | NR          | NR         |
| Koh 2021        | MCOT                 | 1 month   | 105 | 10 | 9.5%  | 65.3 | 4 (2)         | NR             | NR          | 97 (12.6)  |
| Kulach 2021     | MCOT                 | 1 month   | 72  | 1  | 1.4%  | 59.0 | 3.5 (1.6)     | NR             | NR          | 59 (4)     |
| Kulach 2019     | MCOT                 | 7 days    | 78  | 7  | 9%    | 60.0 | 3.6           | NR             | NR          | 59 (4)     |
| Lee 2015        | Inpatient monitoring | 3 days    | 127 | 12 | 9.4%  | 66.0 | NR            | NR             | NR          | NR         |
| Liantinoti 2017 | Inpatient monitoring | 24h       | 184 | 13 | 7%    | 57.0 | 5 (IQR 4-5)   | 6 (range 3-10) | NR          | NR         |
| Liantinoti 2019 | Inpatient monitoring | 24h       | 373 | 29 | 8%    | 60.0 | 3.8 (1.3)     | 4 (range 3-10) | NR          | NR         |
| Lips 2020       | ILR                  | 30 months | 88  | 19 | 21.6% | 66.5 | 4 (range 2-7) | NR             | NR          | NR         |
| Lumikari 2019   | MCOT                 | 1 month   | 57  | 7  | 12.3% | 64.5 | 3.5 (1.2)     | 4.3 (5)        | 1 (IQR 0-1) | NR         |
| Lumikari 2020   | MCOT                 | 2 weeks   | 15  | 1  | 6.7%  | 59.5 | NR            | 1.7 (2.4)      | 1 (IQR 0-1) | NR         |
| Lyren 2020      | MCOT                 | 1 month   | 100 | 9  | 9%    | 67.6 | 4.4 (1.9)     | NR             | NR          | NR         |
| Makimoto 2017   | ILR                  | 12 months | 146 | 30 | 21%   | 62.0 | 4.1 (1.3)     | NR             | NR          | NR         |

|                      |           |                                  |     |                      |                              |      |             |                |    |            |
|----------------------|-----------|----------------------------------|-----|----------------------|------------------------------|------|-------------|----------------|----|------------|
| Manina 2014          | MCOT      | 4 days                           | 114 | 12                   | 24.3%                        | 63.1 | NR          | 6 (2.0)        | NR | NR         |
| Milstein 2020        | ILR       | 12 months                        | 343 | 67                   | 5% (30 days)<br>21% (1 year) | 68   | 3.5 (1.7)   | NR             | NR | 57 (6)     |
| Muller 2017          | ILR       | 12 months                        | 90  | 16                   | 18%                          | 57.7 | 3.4 (1.7)   | NR             | NR | 59.1 (5.5) |
| Pagola 2018          | MCOT      | 1 month                          | 146 | 32                   | 21.9%                        | 76.0 | 5 (IQR 4-6) | 5 (IQR 2-8)    | NR | NR         |
| Pagola 2021          | MCOT      | 1 month                          | 253 | 54                   | 21.3%                        | 74.4 | NR          | NR             | NR | NR         |
| Pedersen 2018        | ILR       | 12 months                        | 105 | 7                    | 6.7%                         | 65.4 | NR          | NR             | NR | NR         |
| Petrovic ova 2021    | ILR       | 12 months                        | 100 | 24                   | 24%                          | 70.1 | 3           | 6.9            | NR | NR         |
| Poli 2016            | ILR       | 12 months                        | 75  | 25                   | 33.3%                        | 66.4 | 5           | NR             | NR | NR         |
| Poulsen 2017         | MCOT      | 1 month                          | 95  | 20                   | 21.1%                        | 78   | 5           | 1              | NR | NR         |
| Rabinstein 2013 (61) | MCOT      | 3 weeks                          | 64  | 3                    | 4.7%                         | 67.9 | NR          | NR             | NR | NR         |
| Reinke 2018          | ILR       | 24 months                        | 105 | 19                   | 18%                          | 64.4 | 4 (IQR 3-6) | 2 (IQR 1-5)    | NR | NR         |
| Riordan 2020         | ILR       | 24 months                        | 293 | 74                   | 25%                          | 67.5 | 5.1 (1.3)   | NR             | NR | NR         |
| Ritter 2013          | ILR, MCOT | 12 months (ILR)<br>7 days (MCOT) | 60  | 10 (ILR)<br>1 (MCOT) | 17%                          | 63.0 | 4 (IQR 3-5) | NR             | NR | NR         |
| RubioCampal 2020     | MCOT      | 3 weeks                          | 50  | 11                   | 22%                          | 69.0 | 4 (1.5)     | NR             | NR | NR         |
| Sanak 2015           | MCOT      | 3 weeks                          | 95  | 9                    | 9.5%                         | 39.1 | 2.7 (1.7)   | 9 (range 3-18) | NR | NR         |
| Seow 2018            | ILR       | 12 months                        | 71  | 11                   | 12.9% (6 months)<br>15.2%    | 61.9 | NR          | 10 (11.3)      | NR | 55         |

|                    |                           |                                            |                          |                                    |                                 |      |             |             |    |                  |
|--------------------|---------------------------|--------------------------------------------|--------------------------|------------------------------------|---------------------------------|------|-------------|-------------|----|------------------|
|                    |                           |                                            |                          |                                    | (12 months)                     |      |             |             |    |                  |
| Toyoda 2021        | MCOT                      | 1 week                                     | 206                      | 13                                 | 6.3%                            | 71.0 | 4.2 (1.3)   | NR          | NR | 64.1 (IQR 61-70) |
| Triantafyllou 2020 | ILR, Inpatient monitoring | 18 months (ILR) 24h (Inpatient monitoring) | 373 Holter ; 123 ILR/ICM | 26 (ILR) 28 (Inpatient monitoring) | 7.5% (Holter) 21.1% (ICM)       | 60.0 | 3 (IQR 2-4) | 3 (IQR 1-5) | NR | 65.0 (6.7)       |
| Tu 2014            | MCOT                      | 3 weeks                                    | 20                       | 1                                  | 5.0% (28 days), 20.0% (2 years) | 66.0 | 2 (IQR 1-3) | 4 (IQR 1-7) | NR | NR               |
| Ungar 2021         | ILR                       | 24 months                                  | 334                      | 92                                 | 27.5%                           | 67.4 | NR          | 3 (3.0)     | NR | NR               |
| Victor 2018        | ILR                       | 24 months                                  | 65                       | 12                                 | 29.2%                           | 65.4 | NR          | 4 (4.8)     | NR | NR               |
| Yayehd 2015        | MCOT                      | 3 weeks                                    | 39                       | 1                                  | 2.6%                            | 48.0 | NR          | 3.5 (4.3)   | NR | NR               |

**Table S2.** Covariate Details in Study Population

## Appendix V: Meta-regression

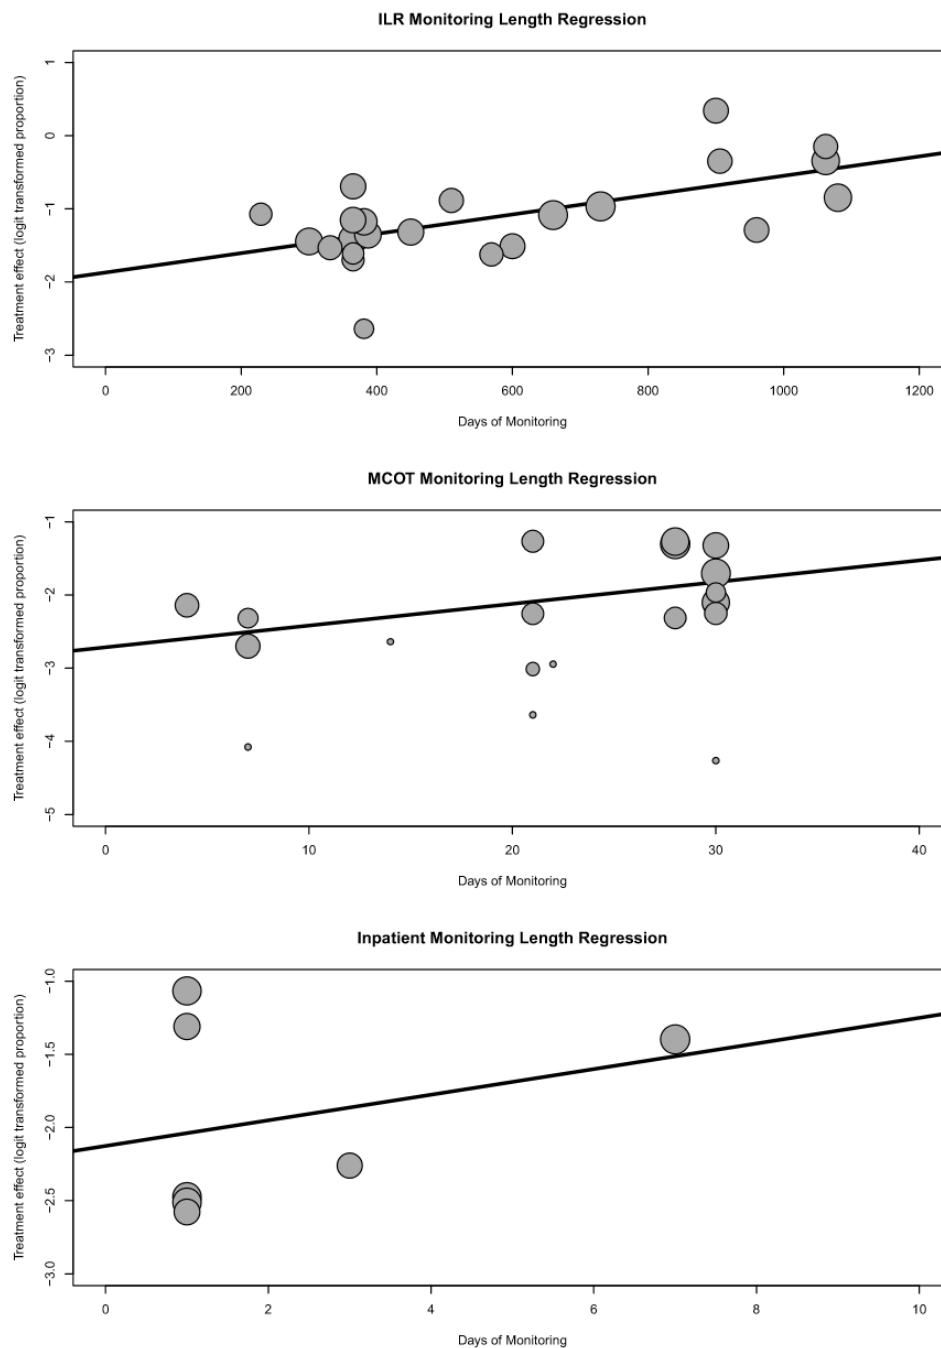**Figure S1.** Meta Regression for length of ECG monitoring



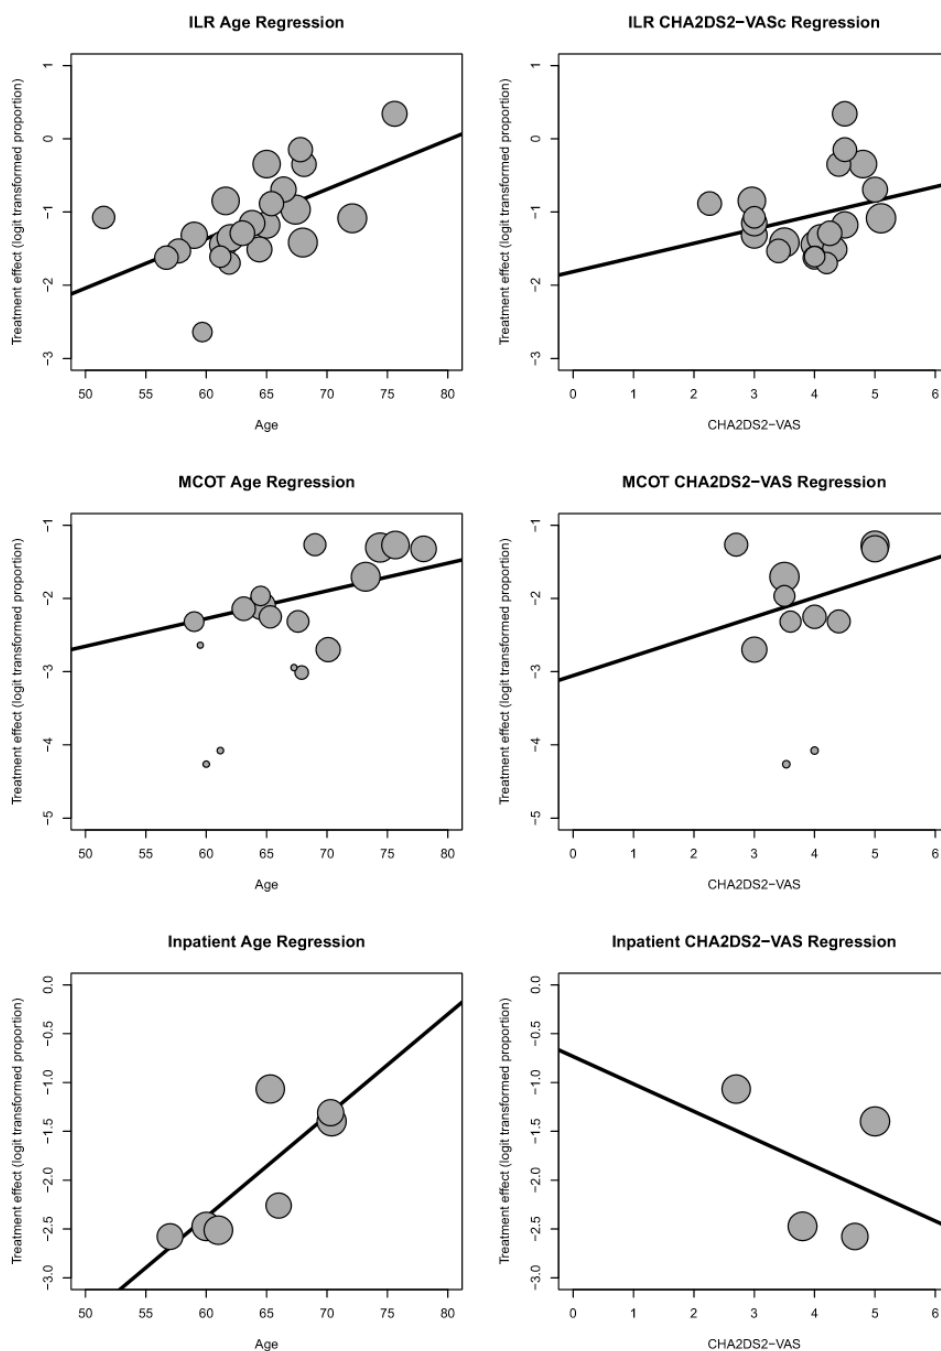

**Figure S2.** Meta Regression for mean patient age and mean CHA2DS2-VAS score

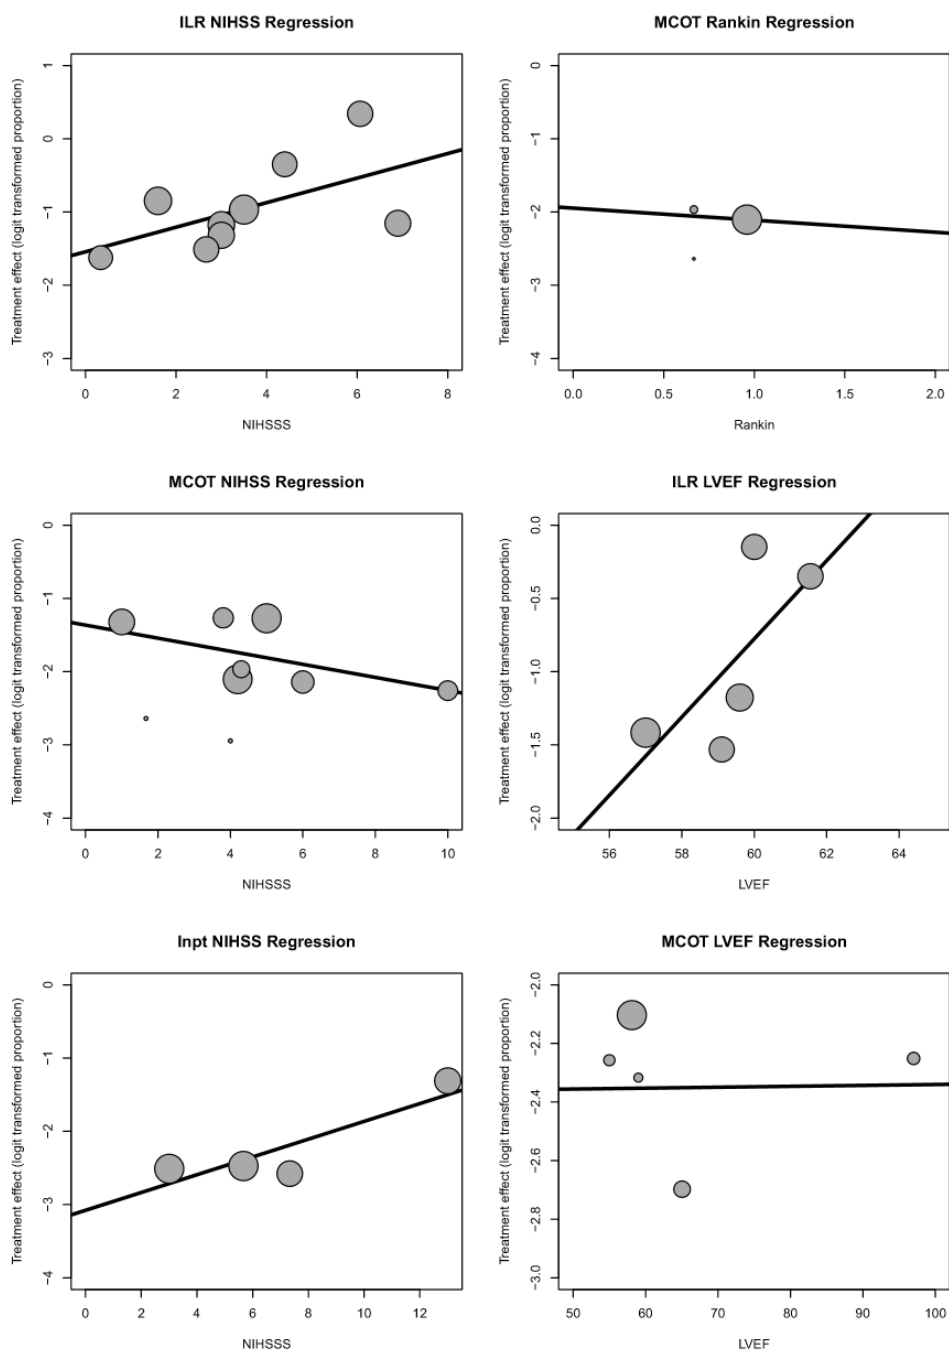

**Figure S3.** Meta Regression for mean patient NIHSS, Rankin, and LVEF

## Appendix VI: Outlier identification

| ECG monitoring modality        | Study omitted       | Subgroup                         | New pooled AF detection rate (95% CI) | I <sup>2</sup> (%) |      |
|--------------------------------|---------------------|----------------------------------|---------------------------------------|--------------------|------|
| ILR                            | Kitsiou 2021        | Duration of monitoring 36 months | 37.1% (0.7-98.0)                      | 77.8               |      |
|                                |                     | Overall                          | 18.4% (14.9-22.4)                     | 86.1               |      |
|                                | Cuadadro-Godia 2020 | Duration of monitoring 30 months | 30.6% (0.1-99.4)                      | 84.4               |      |
|                                |                     | Overall                          | 18.2% (14.9-22.0)                     | 85.2               |      |
|                                | Both                | Overall                          | 17.7% (14.5-21.3)                     | 83.4               |      |
|                                | MCOT                | Pagola 2021                      | Duration of monitoring <28 days       | 12.0% (8.2-17.1)   | 66.8 |
|                                |                     |                                  | AF cut-off 30s                        | 10.0% (7.1-13.7)   | 62.4 |
| Timing of implantation <7 days |                     |                                  | 15.8% (9.1-26.0)                      | 64.6               |      |
| Overall                        |                     |                                  | 10.6% (7.8-14.4)                      | 67.4               |      |

**Table S1.** New pooled AF detection rates after removal of outliers

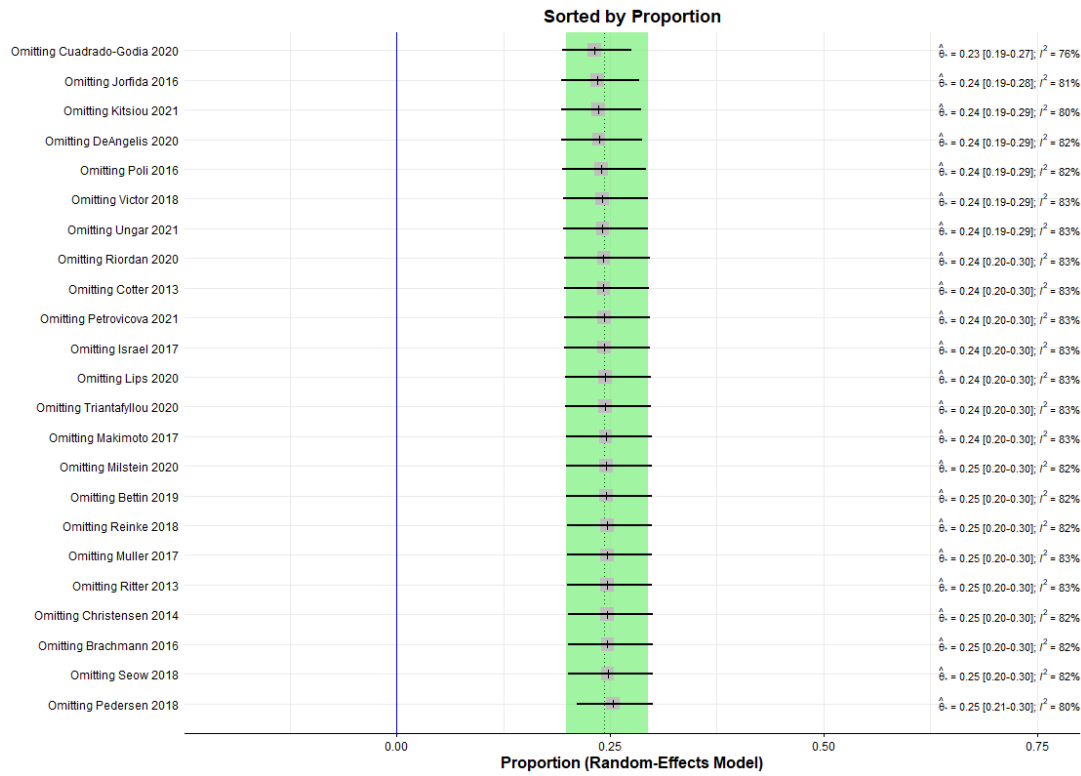

**Figure S1.** Leave-one-out analysis for ILRs for proportion

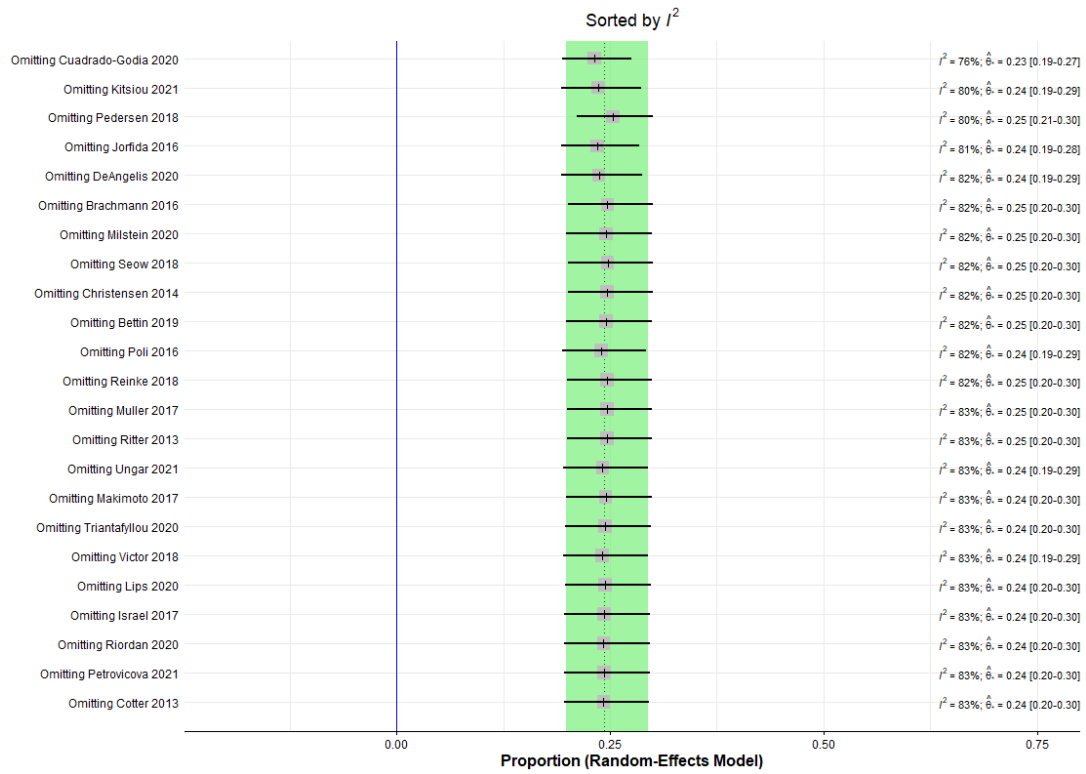

**Figure S2.** Leave-one-out analysis for ILRs for heterogeneity

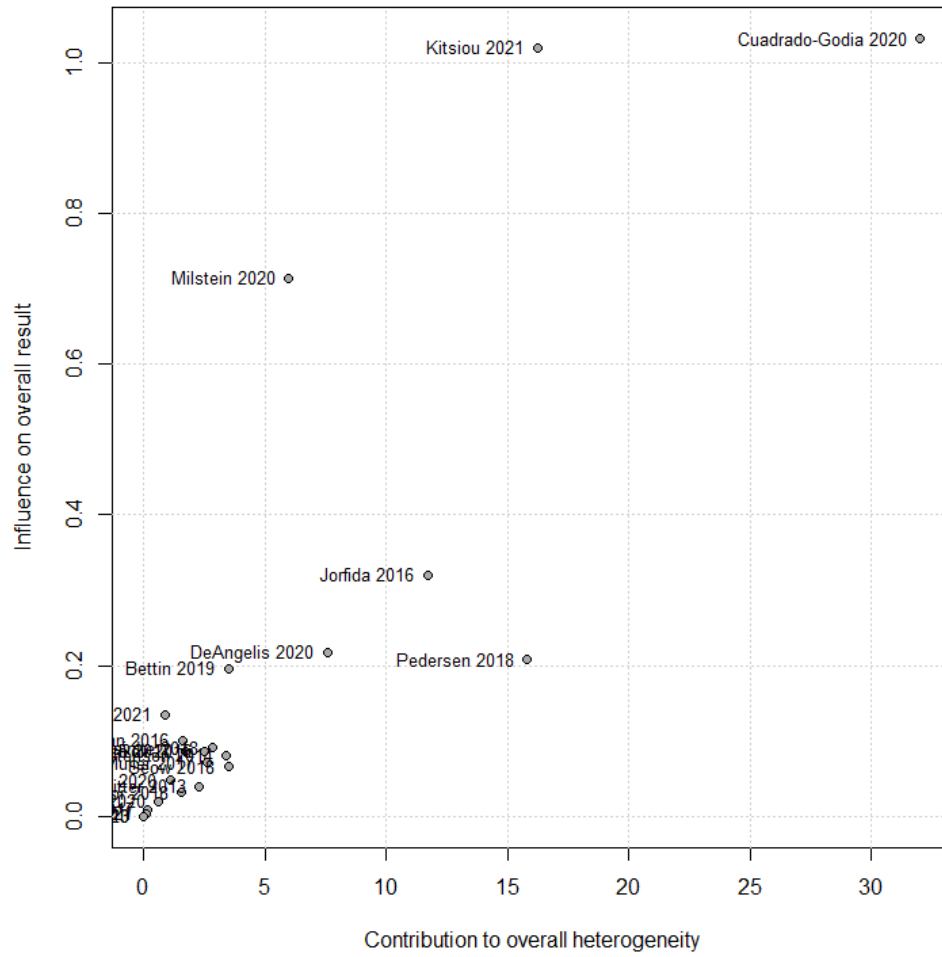

**Figure S3.** Baujat plot for ILRs

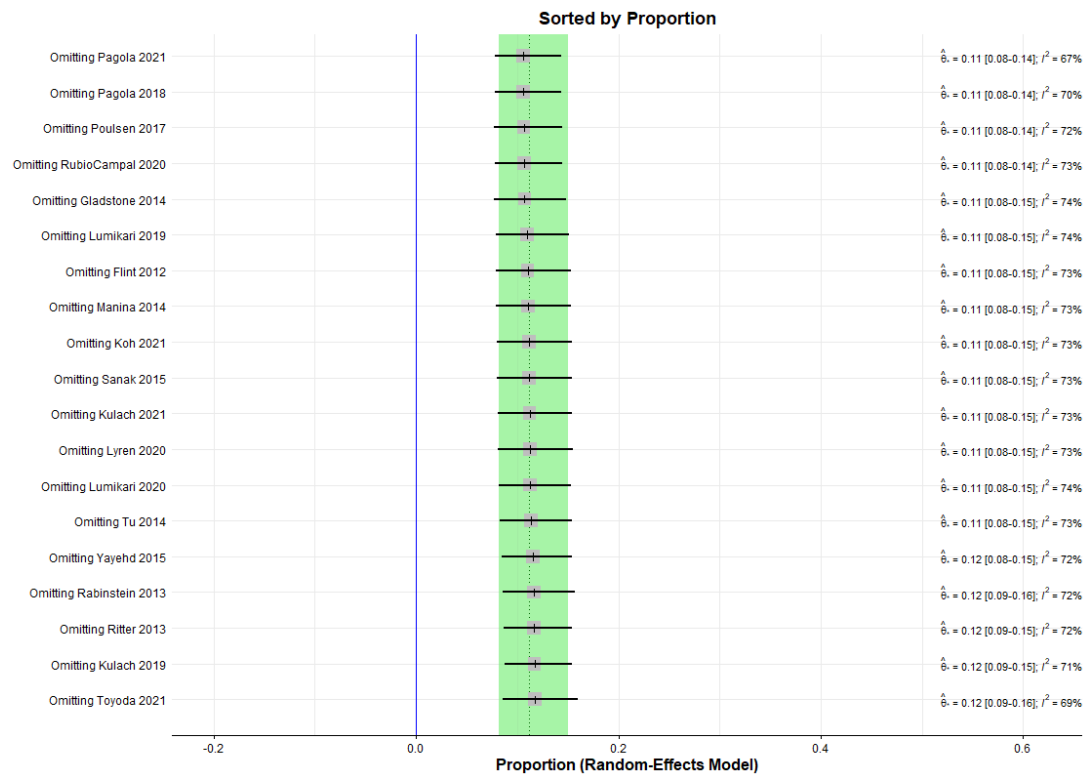

**Figure S4.** Leave-one-out analysis for MCOTs for proportion

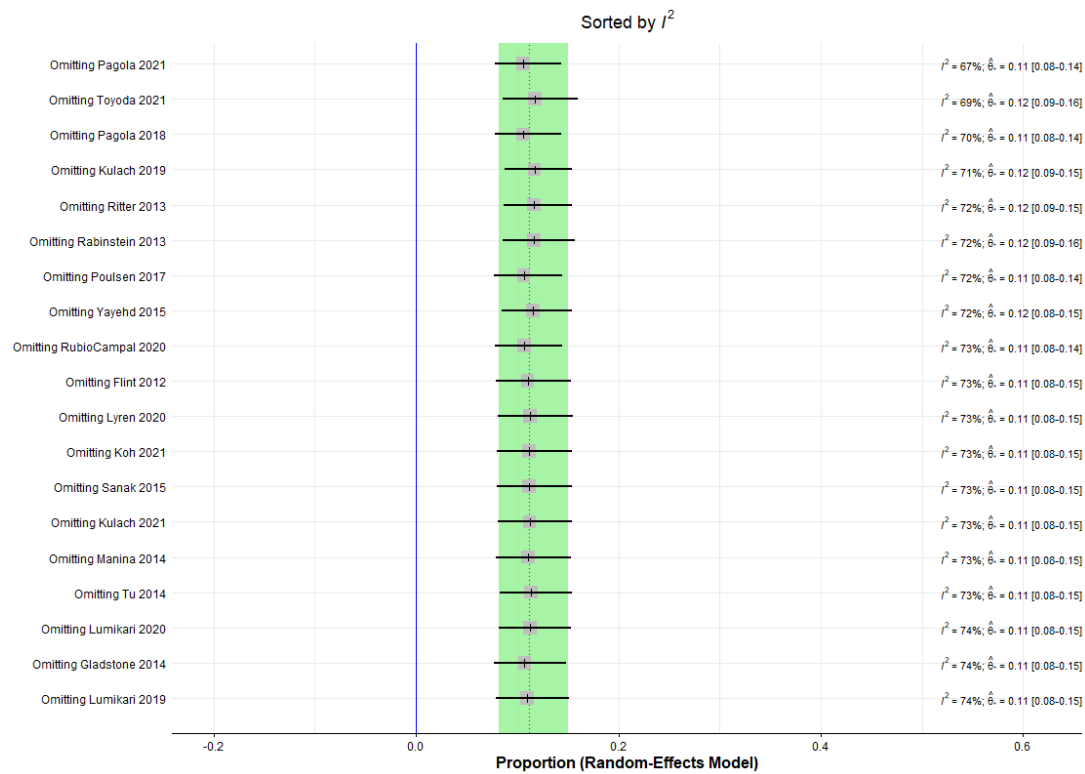

**Figure S5.** Leave-one-out analysis for MCOTs for heterogeneity



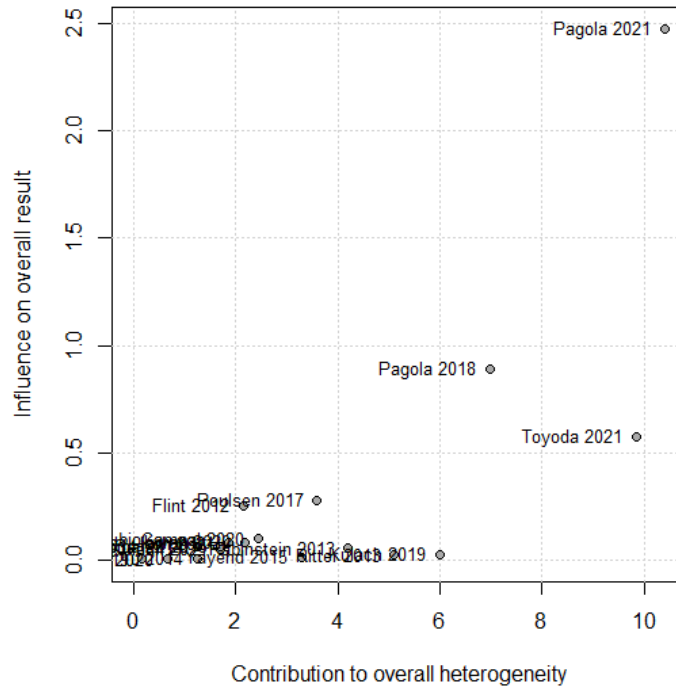

**Figure S6.** Baujat plot for MCOTs

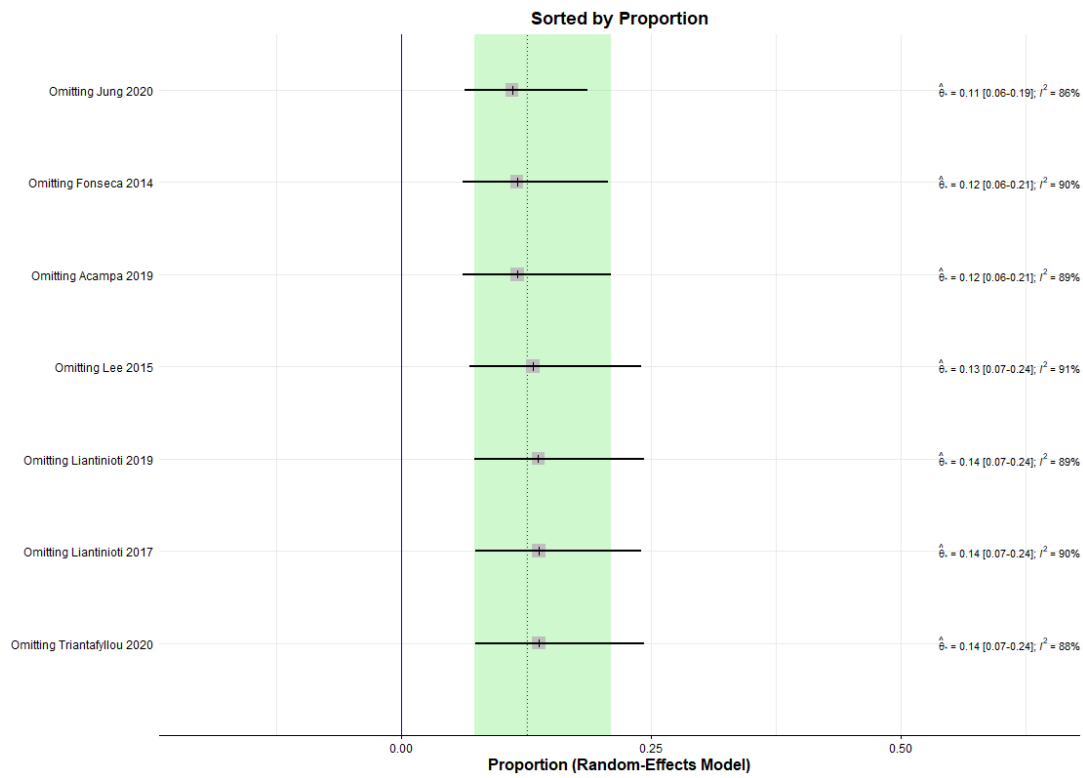

**Figure S7.** Leave-one-out analysis for Inpatient monitoring for proportion

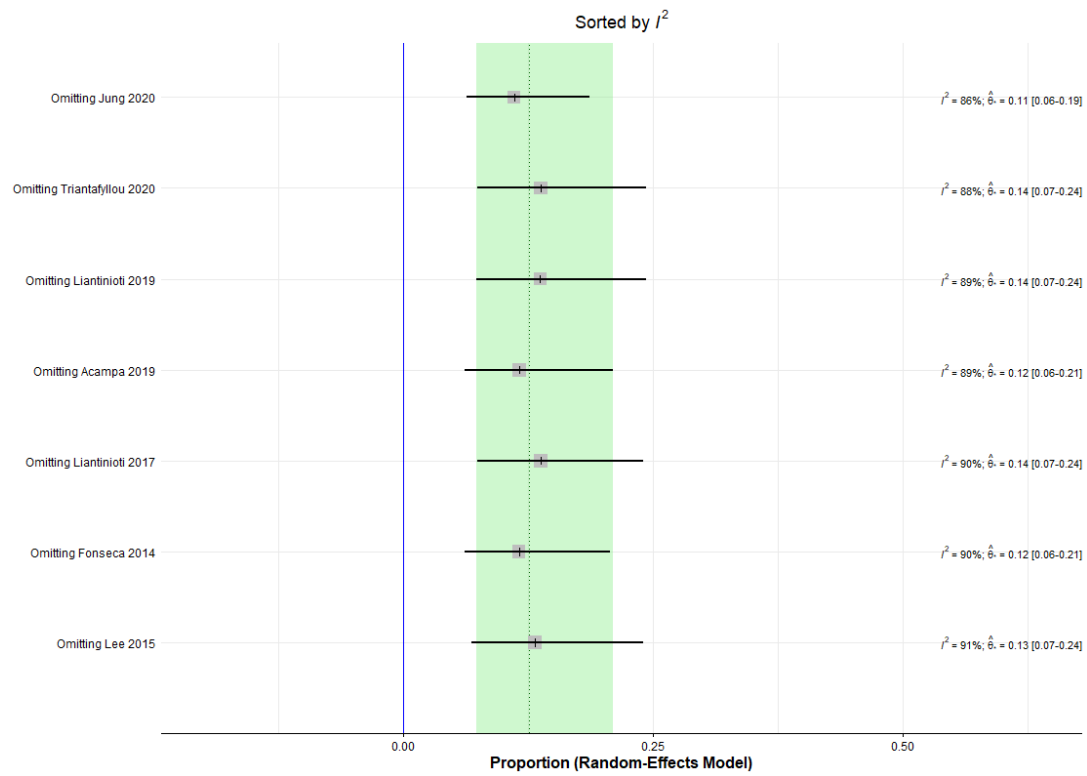

**Figure S8.** Leave-one-out analysis for Inpatient monitoring for heterogeneity

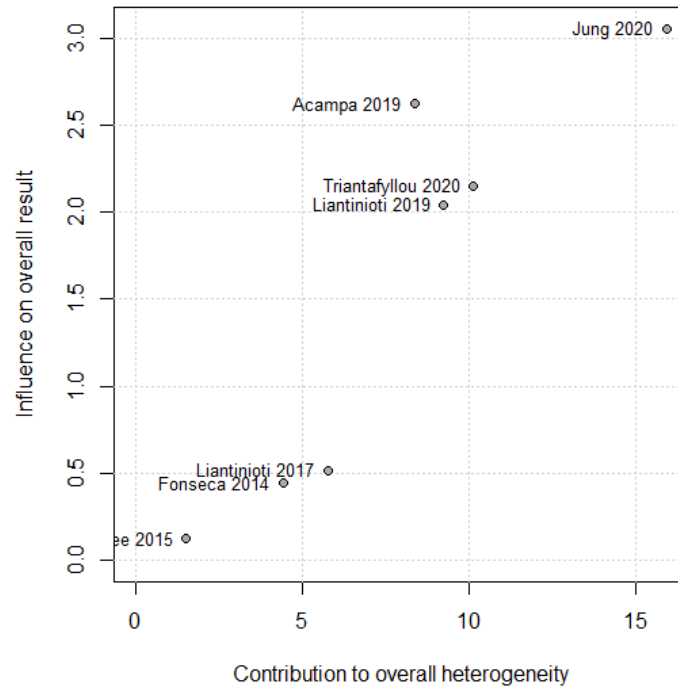

**Figure S9.** Baujat plot for Inpatient monitoring

## Appendix VII: Quality assessment

| Study ID                   | Item 1 | Item 2 | Item 3 | Item 4 | Item 5 | Item 6 | Item 7 | Item 8 | Item 9 | Item 10 | Total | Risk of bias |
|----------------------------|--------|--------|--------|--------|--------|--------|--------|--------|--------|---------|-------|--------------|
| <b>Acampa 2019</b>         | 0      | 1      | 1      | 0      | 1      | 1      | 1      | 1      | 1      | 1       | 8     | Low          |
| <b>Bettin 2019</b>         | 0      | 1      | 1      | 0      | 1      | 1      | 1      | 1      | 1      | 1       | 8     | Low          |
| <b>Christensen 2014</b>    | 0      | 1      | 1      | 1      | 1      | 1      | 1      | 1      | 1      | 1       | 9     | Low          |
| <b>Cotter 2013</b>         | 0      | 1      | 1      | 1      | 1      | 1      | 1      | 1      | 1      | 1       | 9     | Low          |
| <b>Cuadrado-Godia 2020</b> | 0      | 1      | 1      | 1      | 1      | 1      | 1      | 1      | 1      | 1       | 9     | Low          |
| <b>DeAngelis 2020</b>      | 0      | 1      | 1      | 1      | 1      | 1      | 1      | 1      | 1      | 1       | 9     | Low          |
| <b>Fonseca 2014</b>        | 0      | 0      | 1      | 1      | 1      | 1      | 1      | 1      | 1      | 1       | 8     | Low          |
| <b>Israel 2017</b>         | 0      | 1      | 1      | 1      | 1      | 1      | 1      | 1      | 1      | 1       | 9     | Low          |
| <b>Jorfida 2016</b>        | 0      | 1      | 1      | 0      | 1      | 1      | 1      | 1      | 1      | 1       | 8     | Low          |
| <b>Jung 2020</b>           | 0      | 1      | 1      | 1      | 1      | 1      | 1      | 1      | 1      | 1       | 9     | Low          |
| <b>Kitsiou 2021</b>        | 0      | 1      | 1      | 1      | 1      | 1      | 1      | 1      | 1      | 1       | 9     | Low          |
| <b>Kulach 2019</b>         | 0      | 1      | 1      | 0      | 1      | 0      | 1      | 0      | 1      | 1       | 6     | Moderate     |

|                         |   |   |   |   |   |   |   |   |   |   |    |          |
|-------------------------|---|---|---|---|---|---|---|---|---|---|----|----------|
| <b>Kulach 2021</b>      | 0 | 1 | 1 | 1 | 1 | 0 | 1 | 1 | 1 | 1 | 8  | Low      |
| <b>Lee 2015</b>         | 0 | 0 | 1 | 1 | 1 | 1 | 1 | 1 | 1 | 1 | 8  | Low      |
| <b>Liantinioti 2017</b> | 0 | 1 | 1 | 1 | 1 | 1 | 1 | 1 | 1 | 1 | 9  | Low      |
| <b>Liantinioti 2019</b> | 0 | 1 | 1 | 1 | 1 | 1 | 1 | 1 | 1 | 1 | 9  | Low      |
| <b>Lips 2020</b>        | 0 | 1 | 1 | 1 | 1 | 1 | 1 | 0 | 1 | 1 | 8  | Low      |
| <b>Lumikari 2019</b>    | 0 | 1 | 1 | 1 | 1 | 1 | 1 | 1 | 1 | 1 | 9  | Low      |
| <b>Lumikari 2020</b>    | 0 | 0 | 1 | 1 | 1 | 1 | 0 | 1 | 1 | 1 | 7  | Moderate |
| <b>Lyren 2020</b>       | 1 | 1 | 1 | 1 | 1 | 1 | 0 | 1 | 1 | 1 | 9  | Low      |
| <b>Makimoto 2017</b>    | 0 | 1 | 1 | 0 | 1 | 1 | 1 | 1 | 1 | 1 | 8  | Low      |
| <b>Manina 2014</b>      | 0 | 1 | 1 | 1 | 1 | 1 | 1 | 1 | 1 | 1 | 9  | Low      |
| <b>Milstein 2020</b>    | 1 | 1 | 1 | 1 | 1 | 1 | 1 | 1 | 1 | 1 | 10 | Low      |
| <b>Muller 2017</b>      | 1 | 1 | 1 | 0 | 1 | 1 | 1 | 1 | 1 | 1 | 9  | Low      |
| <b>Pagola 2018</b>      | 1 | 1 | 1 | 1 | 1 | 1 | 0 | 0 | 1 | 1 | 8  | Low      |
| <b>Pagola 2021</b>      | 1 | 0 | 1 | 1 | 1 | 0 | 1 | 1 | 1 | 1 | 8  | Low      |
| <b>Pedersen 2018</b>    | 0 | 1 | 1 | 0 | 1 | 0 | 1 | 1 | 1 | 1 | 7  | Moderate |
| <b>Petrovicova 2021</b> | 0 | 1 | 1 | 0 | 1 | 1 | 1 | 1 | 1 | 1 | 8  | Low      |

|                               |   |   |   |   |   |   |   |   |   |   |   |          |
|-------------------------------|---|---|---|---|---|---|---|---|---|---|---|----------|
| <b>Poli 2016</b>              | 0 | 1 | 1 | 1 | 1 | 1 | 1 | 0 | 1 | 1 | 8 | Low      |
| <b>Poulsen 2017</b>           | 0 | 1 | 1 | 1 | 1 | 1 | 0 | 1 | 1 | 1 | 8 | Low      |
| <b>Rabinstein 2013</b>        | 0 | 0 | 1 | 1 | 1 | 1 | 1 | 1 | 1 | 1 | 8 | Low      |
| <b>Reinke 2018</b>            | 0 | 1 | 1 | 0 | 1 | 1 | 1 | 1 | 1 | 1 | 8 | Low      |
| <b>Riordan 2020</b>           | 0 | 1 | 1 | 1 | 1 | 1 | 1 | 1 | 1 | 1 | 9 | Low      |
| <b>Ritter 2013</b>            | 0 | 1 | 1 | 0 | 1 | 1 | 1 | 1 | 1 | 1 | 8 | Low      |
| <b>RubioCampal<br/>2020</b>   | 0 | 0 | 0 | 0 | 1 | 1 | 1 | 1 | 1 | 1 | 6 | Moderate |
| <b>Sanak 2015</b>             | 0 | 0 | 1 | 1 | 1 | 1 | 1 | 1 | 1 | 1 | 8 | Low      |
| <b>Seow 2018</b>              | 0 | 1 | 0 | 0 | 1 | 1 | 1 | 1 | 1 | 1 | 7 | Moderate |
| <b>Triantafyllou<br/>2020</b> | 0 | 1 | 1 | 0 | 1 | 1 | 1 | 0 | 1 | 1 | 7 | Moderate |
| <b>Tu 2014</b>                | 0 | 0 | 1 | 1 | 1 | 1 | 1 | 1 | 1 | 1 | 8 | Low      |
| <b>Victor 2018</b>            | 0 | 1 | 1 | 1 | 1 | 1 | 1 | 0 | 1 | 1 | 8 | Low      |
| <b>Yayehd 2015</b>            | 0 | 0 | 1 | 1 | 1 | 0 | 0 | 1 | 1 | 1 | 6 | Moderate |
| <b>Flint 2012</b>             | 1 | 1 | 1 | 0 | 1 | 0 | 1 | 1 | 1 | 1 | 8 | Low      |

|                                                                                              |   |   |   |   |   |   |   |   |   |   |    |     |
|----------------------------------------------------------------------------------------------|---|---|---|---|---|---|---|---|---|---|----|-----|
| <b>Toyoda 2021</b>                                                                           | 1 | 1 | 1 | 1 | 1 | 1 | 1 | 1 | 1 | 1 | 10 | Low |
| <b>Ungar 2021</b>                                                                            | 1 | 1 | 1 | 1 | 1 | 1 | 1 | 0 | 1 | 1 | 9  | Low |
| <b>Brachmann 2016</b>                                                                        | 1 | 1 | 1 | 1 | 1 | 1 | 1 | 0 | 1 | 1 | 9  | Low |
| <b>Gladstone 2014</b>                                                                        | 1 | 1 | 1 | 1 | 1 | 1 | 1 | 0 | 1 | 1 | 9  | Low |
| <b>Koh 2021</b>                                                                              | 1 | 1 | 1 | 1 | 1 | 0 | 1 | 0 | 1 | 1 | 8  | Low |
| <p>≤4: High risk of bias</p> <p>5-7: Moderate risk of bias</p> <p>8-10: Low risk of bias</p> |   |   |   |   |   |   |   |   |   |   |    |     |

**Table S1:** Risk of bias assessment



## Appendix VIII: Publication bias

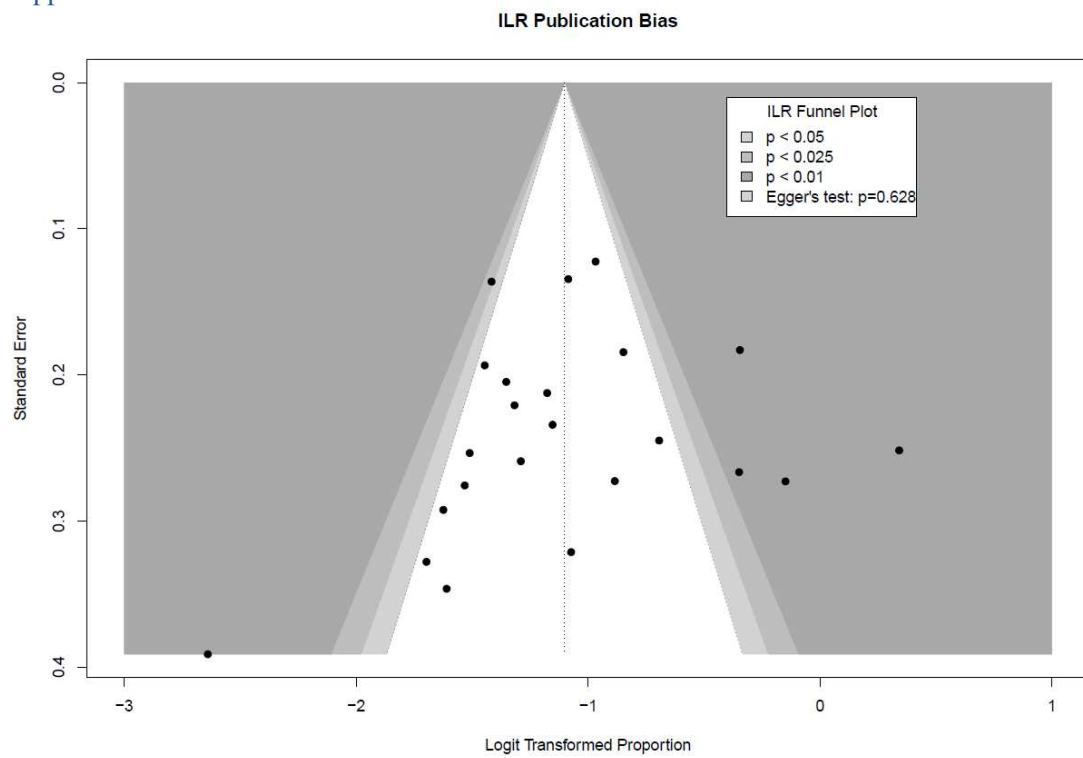

**Figure S1.** Funnel plot for the meta-analysis of atrial fibrillation proportion detected by implantable loop recorders

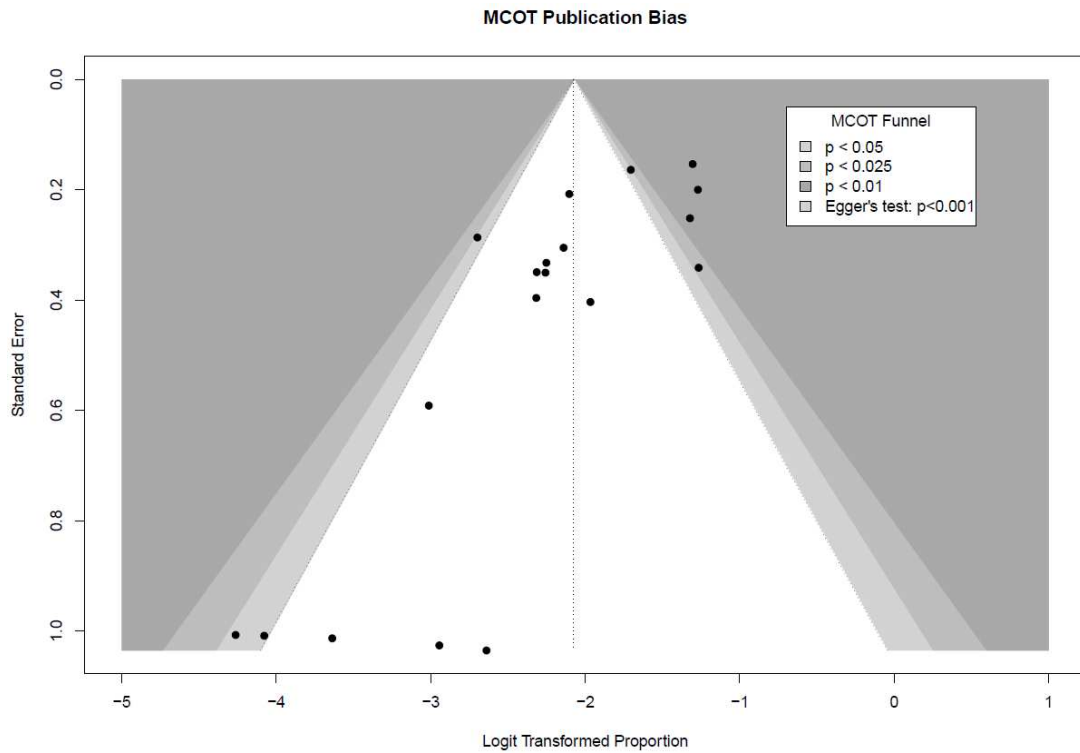

**Figure S2.** Funnel plot for the meta-analysis of atrial fibrillation proportion detected by Mobile Cardiac Outpatient Telemetry

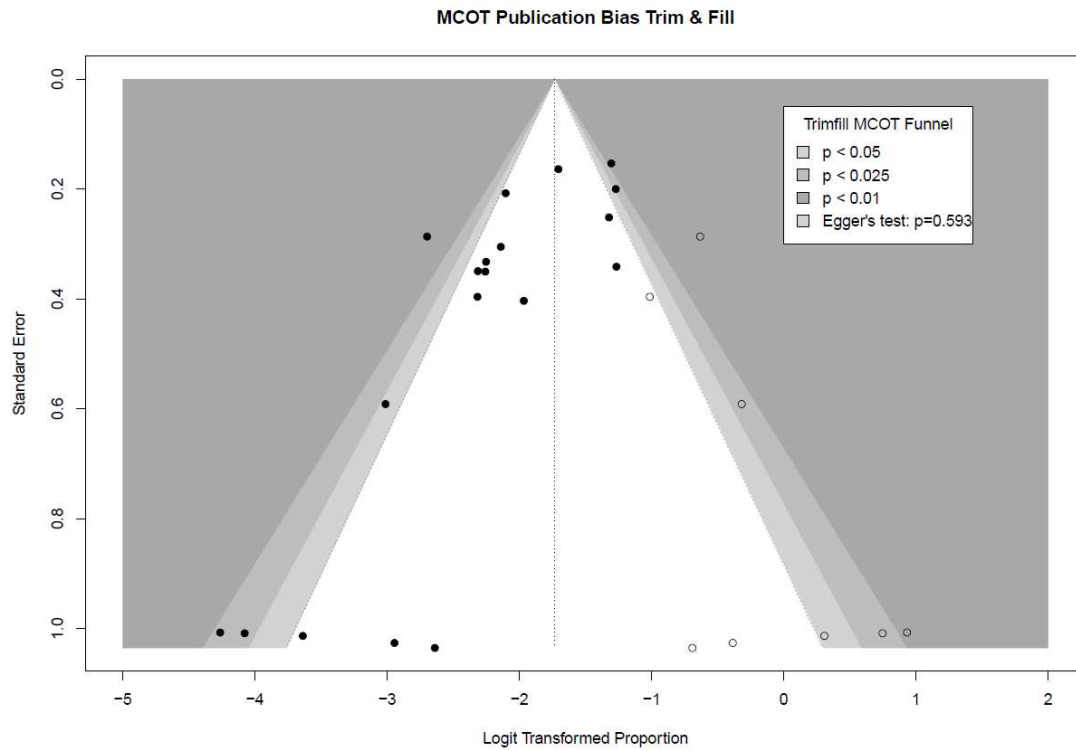

**Figure S3.** Funnel plot for the meta-analysis of atrial fibrillation proportion detected by Mobile Cardiac Outpatient Telemetry with imputed studies by Trim & Fill method

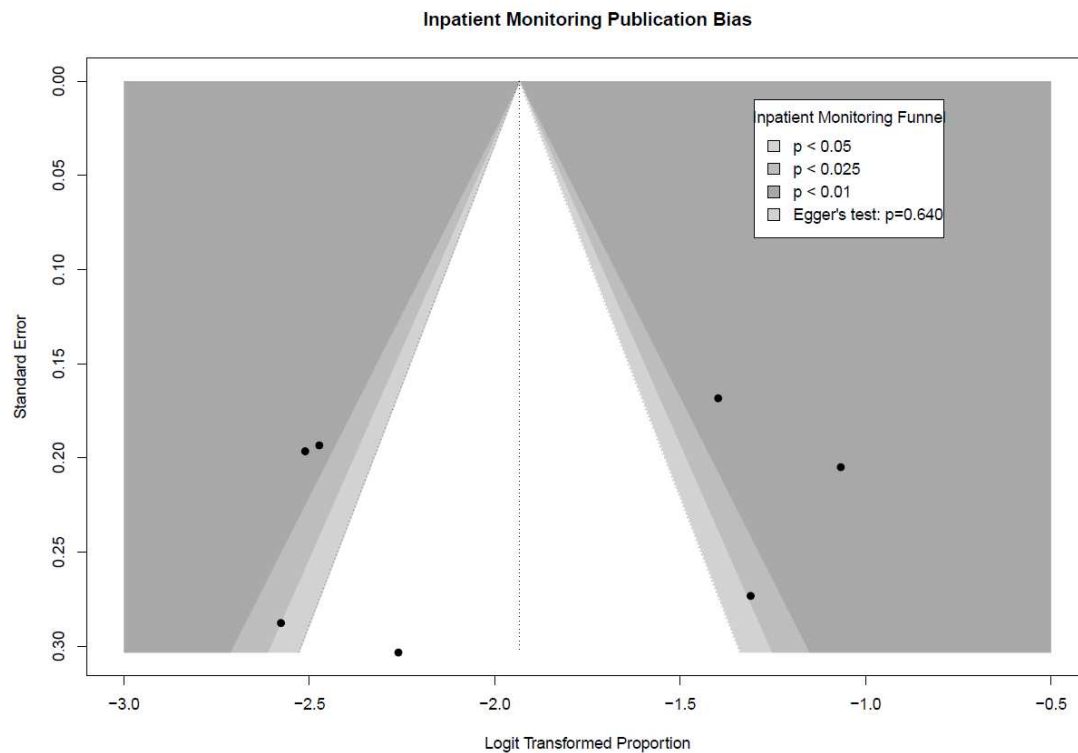

**Figure S4.** Funnel plot for the meta-analysis of atrial fibrillation proportion detected by Inpatient Monitoring

| Modality             | Intercept (95% CI)    | t      | p             |
|----------------------|-----------------------|--------|---------------|
| ILR                  | -0.784 (-3.90, 2.34)  | -0.492 | 0.63          |
| MCOT                 | -2.664 (-3.93, -1.39) | -4.113 | <b>0.0007</b> |
| MCOT Trim & Fill     | -0.404 (-1.87, 1.06)  | -0.541 | 0.59          |
| Inpatient Monitoring | -2.98 (-14.73, 8.77)  | -0.497 | 0.64          |

**Table S1:** Egger's test results
